# Supplementary material
Source: MDPI journal article supplement (https://www.mdpi.com/2073-4433/15/5/555)
Supplement: s1 [file s1]

## Supplementary Materials:

Jason A. Miech <sup>1</sup>, Pierre Herckes <sup>1</sup>, Matthew P. Fraser <sup>2,\*</sup>, Avelino F. Arellano <sup>3,4</sup>, Mohammad Amin Mirrezaei <sup>3,4</sup> and Yafang Guo <sup>3,4</sup>

<sup>1</sup> School of Molecular Sciences, Arizona State University, Tempe, AZ 85287, USA; herckes@asu.edu (P.H.)

<sup>2</sup> School of Sustainable Engineering and the Built Environment, Ira A. Fulton Schools of Engineering, Arizona State University, Tempe, AZ 85287, USA

<sup>3</sup> Department of Chemical and Environmental Engineering, University of Arizona, Tucson, AZ 85721, USA; afarellano@arizona.edu (A.F.A.); amirrezaei@email.arizona.edu (M.A.M.); guoy1@arizona.edu (Y.G.)

<sup>4</sup> Department of Hydrology and Atmospheric Sciences, University of Arizona, Tucson, AZ 85721, USA

\* Correspondence: matthew.fraser@asu.edu; Tel.: +1-480-965-3489

**Table S1.** Canister sampling dates and analysis performed at the four MCAQD sites.

| Date Sampled | Buckeye     | Mesa          | North Phoenix | Pinnacle Peak |
|--------------|-------------|---------------|---------------|---------------|
| 5/04/21      | Carb, SNMOC | Carb, , SNMOC | Carb, SNMOC   | Carb, SNMOC   |
| 5/10/21      | Carb, SNMOC | Carb, SNMOC   | Carb, SNMOC   | Carb, SNMOC   |
| 5/16/21      | Carb, SNMOC | Carb, SNMOC   | Carb, SNMOC   | Carb, SNMOC   |
| 5/22/21      | Carb, SNMOC | Carb, SNMOC   | Carb, SNMOC   | Carb, SNMOC   |
| 5/28/21      | Carb, SNMOC | Carb, SNMOC   | Carb, SNMOC   | Carb, SNMOC   |
| 6/03/21      | Carb, SNMOC | Carb, SNMOC   | Carb, SNMOC   | Carb, SNMOC   |
| 6/09/21      | Carb, SNMOC | Carb, SNMOC   | Carb, SNMOC   | Carb, SNMOC   |
| 6/15/21      | Carb, SNMOC | Carb, SNMOC   | Carb, SNMOC   | Carb, SNMOC   |
| 6/21/21      | Carb, SNMOC | Carb, SNMOC   | Carb, SNMOC   | Carb, SNMOC   |
| 6/27/21      | Carb, SNMOC | Carb, SNMOC   | Carb, SNMOC   | Carb, SNMOC   |
| 7/03/21      | Carb, SNMOC | Carb, SNMOC   | Carb, SNMOC   | Carb, SNMOC   |
| 7/09/21      | Carb, SNMOC | Carb, SNMOC   | Carb          | Carb, SNMOC   |
| 7/15/21      | Carb, SNMOC | Carb, SNMOC   | Carb, SNMOC   | Carb, SNMOC   |
| 7/18/21      | SNMOC       | X             | SNMOC         | X             |
| 7/21/21      | Carb, SNMOC | Carb, SNMOC   | Carb, SNMOC   | Carb, SNMOC   |
| 7/27/2021    | Carb, SNMOC | Carb, SNMOC   | Carb, SNMOC   | Carb, SNMOC   |
| 8/02/21      | Carb, SNMOC | Carb, SNMOC   | Carb, SNMOC   | Carb, SNMOC   |
| 8/08/21      | Carb, SNMOC | Carb, SNMOC   | Carb, SNMOC   | Carb, SNMOC   |
| 8/14/21      | SNMOC       | Carb, SNMOC   | Carb, SNMOC   | SNMOC         |
| 8/20/21      | Carb, SNMOC | Carb, SNMOC   | Carb          | Carb, SNMOC   |
| 8/26/21      | Carb, SNMOC | Carb, SNMOC   | Carb, SNMOC   | Carb, SNMOC   |
| 9/01/21      | Carb, SNMOC | Carb, SNMOC   | Carb, SNMOC   | Carb, SNMOC   |
| 9/07/21      | Carb        | Carb, SNMOC   | Carb, SNMOC   | Carb, SNMOC   |
| 9/13/21      | Carb, SNMOC | Carb, SNMOC   | Carb, SNMOC   | Carb, SNMOC   |
| 9/19/21      | Carb, SNMOC | Carb, SNMOC   | Carb, SNMOC   | Carb, SNMOC   |
| 9/25/21      | Carb        | Carb, SNMOC   | Carb, SNMOC   | Carb, SNMOC   |

**Table S2.** Dates and times of TROPOMI retrievals.

| Date     | Buckeye Time | Pinnacle Peak Time | Phoenix JLG Time |
|----------|--------------|--------------------|------------------|
| 05/04/21 | 11:52-14:30  | 11:52-14:30        | N/A              |
| 05/10/21 | 11:21-14:19  | 11:21-14:19        | N/A              |
| 05/16/21 | 13:10-14:07  | 13:10-14:07        | N/A              |
| 05/22/21 | 12:56-13:55  | 12:56-13:55        | N/A              |

|          |             |             |             |
|----------|-------------|-------------|-------------|
| 06/03/21 | 12:31-13:30 | 12:31-13:30 | 12:31-13:30 |
| 06/06/21 | N/A         | N/A         | 13:16-14:14 |
| 06/09/21 | 12:38-15:00 | 12:38-15:00 | 12:38-15:00 |
| 06/12/21 | N/A         | N/A         | 13:03-14:02 |
| 06/15/21 | 12:06-14:45 | 12:06-14:45 | 12:06-14:46 |
| 06/18/21 | N/A         | N/A         | 12:51-13:49 |
| 06/24/21 | N/A         | N/A         | 12:38-13:36 |
| 06/27/21 | 13:22-14:21 | 13:22-14:21 | 13:22-14:21 |
| 06/30/21 | N/A         | N/A         | 12:25-15:05 |
| 07/03/21 | 13:09-14:46 | 13:09-14:46 | 13:09-14:46 |
| 07/12/21 | N/A         | N/A         | 12:00-15:39 |
| 07/21/21 | 12:31-13:29 | 12:31-13:29 | N/A         |
| 07/27/21 | 12:18-14:56 | 12:18-14:56 | 12:18-14:58 |
| 07/30/21 | N/A         | N/A         | 13:02-14:00 |
| 08/02/21 | 12:05-14:43 | 12:05-14:43 | 12:05-14:44 |
| 08/05/21 | N/A         | N/A         | 14:49-14:25 |
| 08/08/21 | 13:33-14:25 | 13:33-14:25 | 13:33-14:25 |
| 08/11/21 | N/A         | N/A         | 12:36-13:34 |
| 08/14/21 | N/A         | N/A         | 13:20-14:18 |
| 08/20/21 | 13:07-14:05 | 13:07-14:05 | 13:07-14:05 |
| 08/23/21 | N/A         | N/A         | 12:09-14:49 |
| 08/26/21 | 12:53-13:46 | 12:53-13:46 | 12:53-13:46 |
| 08/28/21 | N/A         | N/A         | 12:15-14:55 |
| 08/29/21 | N/A         | N/A         | 11:56-14:36 |
| 09/01/21 | 12:40-13:38 | 12:40-13:38 | N/A         |
| 09/07/21 | 12:27-13:25 | 12:27-13:25 | N/A         |
| 09/13/21 | 12:13-14:56 | 12:13-14:56 | N/A         |
| 09/19/21 | 12:00-14:40 | 12:00-14:40 | N/A         |
| 09/25/21 | 13:28-14:21 | 13:28-14:21 | N/A         |

### Photolysis Rate Calculation

Equation (S1) states the preliminary formula used in the NO<sub>2</sub> photolysis rate calculation, where  $k_p$  is the photolysis rate,  $\phi_{av}$  is the primary quantum yield,  $\sigma_{av}$  is the absorption cross-section (cm<sup>2</sup> molecule<sup>-1</sup>), and  $F_{av}$  is the actinic flux (photons cm<sup>-2</sup> s<sup>-1</sup>) [65]. Primary quantum yield values for NO<sub>2</sub> were obtained from [64] for the wavelength range of 290–430 nm. Averaged absorption cross sections for NO<sub>2</sub> were calculated using Equation S2, the values provided in Finlayson-Pitts and Pitts, and the hourly temperature values ( $T$ ) taken from the 13 sites using MCAQD and AZDEQ sensors. Our modified photolysis calculation is outlined below where  $F_{tot}$  is the total downward actinic flux,  $E_{dir}$  is the direct solar radiation as taken from the Maricopa County Flood Control District (MCFCD) meteorological stations,  $\theta_z$  is the solar zenith angle for each site,  $E_{dif}$  is the diffuse solar radiation, and  $r_d$  is the ratio of diffuse actinic flux to diffuse solar radiation, estimated using Equation S6 [66]. Our analysis uses  $D$  as the ratio of direct irradiance to global irradiance estimated using [65]. It should be noted that this method assumes clear-sky conditions, an altitude of 1.6 km, and aerosol optical depths close to zero.

$$k_p = \sum_{\lambda=290nm}^{\lambda} \phi_{av}(\lambda) \sigma_{av}(\lambda) F_{av}(\lambda) \quad (S1)$$

$$\sigma(T) = \sigma(0^\circ\text{C}) + aT \quad (S2)$$

$$N_p = \frac{I}{E_p} = \frac{I \times \lambda \times 10^{-9}}{hc \times 10,000} \quad (S3)$$

$$F_{av} \approx \frac{N_p}{\cos(\theta_z)} \quad (S4)$$

$$F_{tot} = \frac{E_{dir}}{\cos(\theta_z)} + \frac{E_{dif}}{r_d} \quad (S5)$$

$$r_d = \frac{E_{diff}}{F_{diff}} \cong 0.5 - \left( \frac{\lambda - 300}{1000} \right) \quad (S6)$$

$$F_{tot} = E \left\{ \frac{1 - D}{\cos(\theta_z)} + \frac{D}{r_d} \right\} \quad (S7)$$

- $K_p$ : Photolysis rate ( $s^{-1}$ )
- $\phi_{av}(\lambda)$ : Primary quantum yield
- $\sigma_{av}(\lambda)$ : Absorption cross-section ( $cm^2 \text{ molecule}^{-1}$ )
- $F_{av}(\lambda)$ : Actinic flux ( $photons \text{ cm}^{-2} \text{ s}^{-1}$ )
- $\lambda$ : Wavelength (nm)
- $a$ : Temperature coefficient
- $T$ : Temperature ( $^{\circ}C$ )
- $N_p$ : Photon flux ( $photons/m^2$ )
- $I$ : Irradiance ( $W/m^2$ )
- $E_p$ : Photon energy (J)
- $hc$ : Plank's constant multiplied by the speed of light (J m)
- $\theta_z$ : Solar zenith angle (degrees)
- $F_{tot}$ : Total downward actinic flux ( $photons \text{ cm}^{-2} \text{ s}^{-1}$ )
- $E_{dir}$ : Direct solar radiation ( $W/m^2$ )
- $E_{dif}$ : Diffuse solar radiation ( $W/m^2$ )
- $r_d$ : Ratio of diffuse actinic flux to diffuse solar radiation
- $F_{diff}$ : Diffuse actinic flux ( $photons \text{ cm}^{-2} \text{ s}^{-1}$ )
- $E$ : Irradiance ( $W/m^2$ )
- $D$ : Diffuse fraction, ratio of diffuse/global irradiance

Figure S1 demonstrates the results of this calculation for West Phoenix where the photolysis rate resembles a bell curve peaking midday which is what we would expect to see based on other published work, [66], and magnitudes are similar to a previous study conducted in Phoenix [67,68]. To add some more context to  $NO_2$  photolysis rate, the inverse of the photolysis rate is the lifetime of the species due photolysis. At noon for example, a photolysis rate of  $14 \times 10^{-3} \text{ s}^{-1}$  leads to a lifetime of 71s for a  $NO_2$  molecule. To minimize errors in the final analysis we used the solar radiation values from the Maricopa County Flood Control District (MCFCD) meteorological station at City of Glendale for all 13 sites used in this study. The photolysis rates were then multiplied by the site measured  $NO_2$  to compare to the measured ozone.

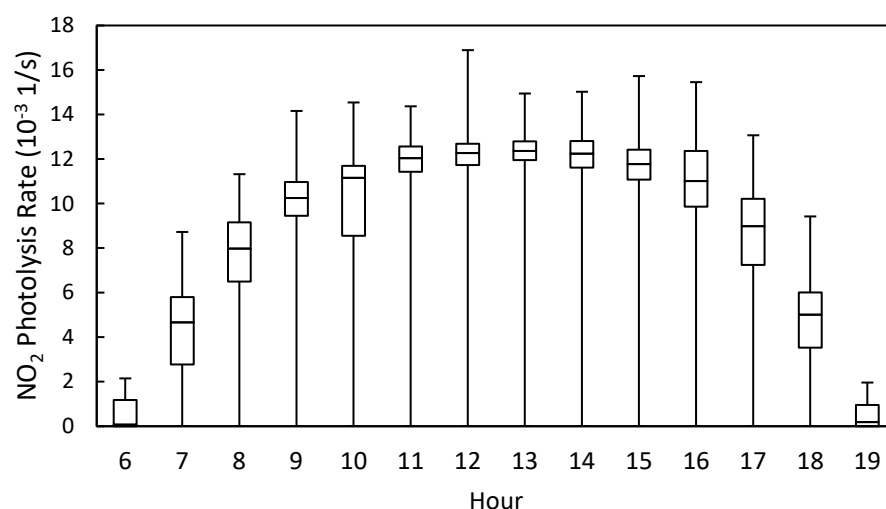

**Figure S1.** Box and whisker plot for the calculated  $\text{NO}_2$  photolysis rates at West Phoenix during the study period. The lines within the boxes represent the medians, the interquartile range is the range of the boxes with the top representing the 75<sup>th</sup> and the bottom the 25<sup>th</sup> percentile. The whiskers represent the maximum and minimum values in the data.

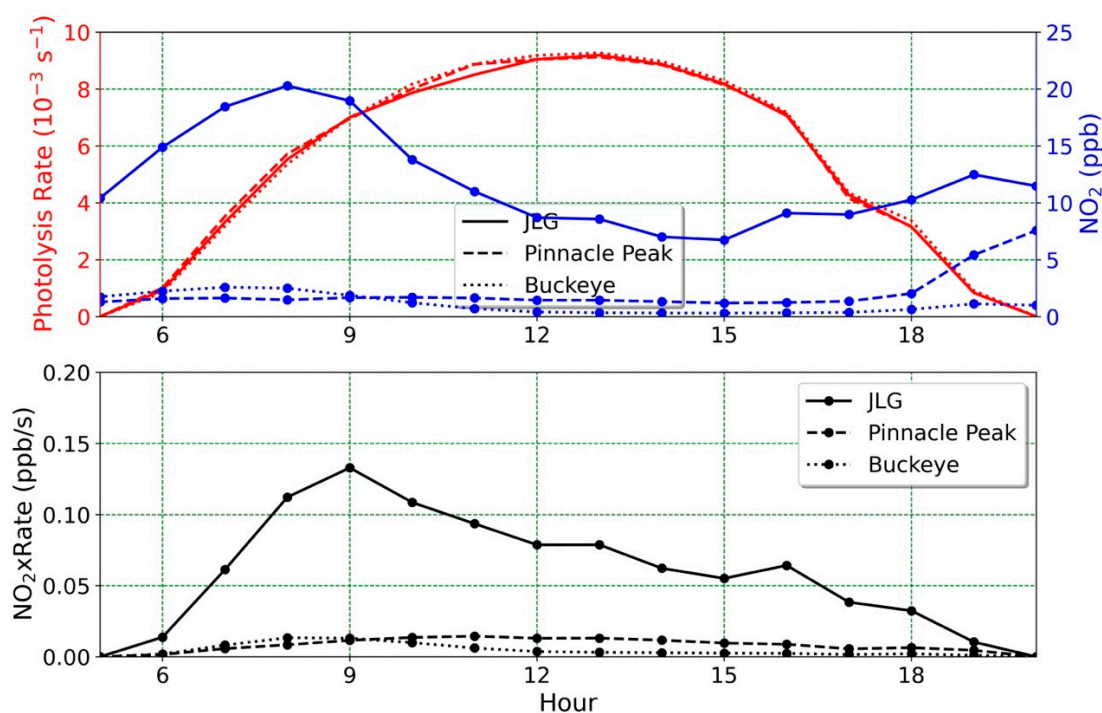

**Figure S2.** WRF-Chem simulated monthly mean diurnal variation of  $\text{NO}_2$  photolysis rate and  $\text{NO}_2$  concentration (top), and  $\text{NO}_2 \times \text{Rate}$  (bottom) at three selected sites: JLG supersite, Pinnacle Peak, and Buckeye during June 2021.

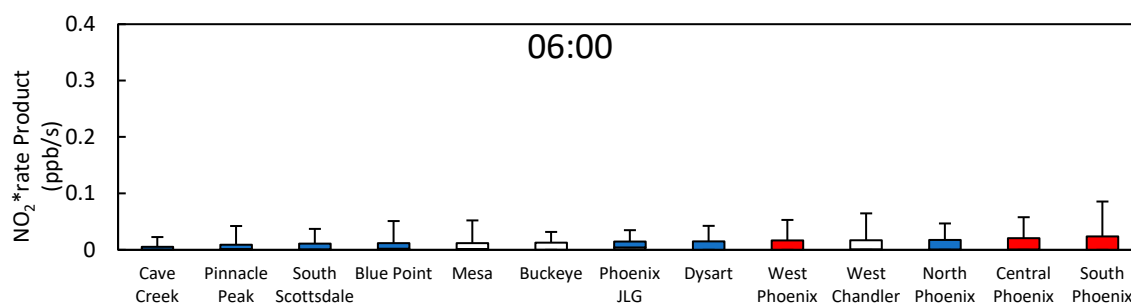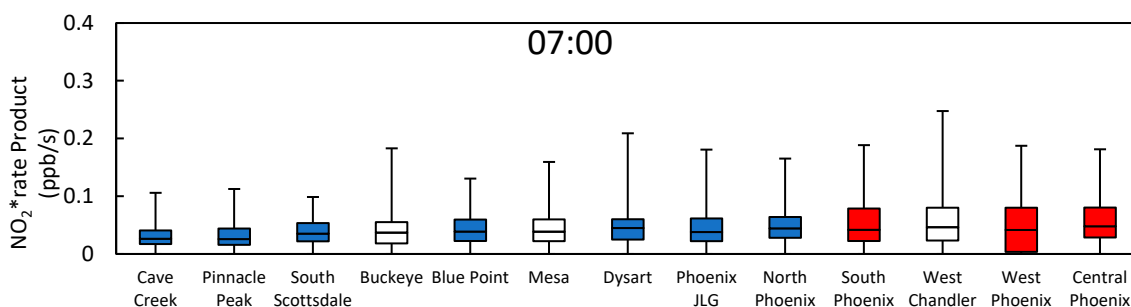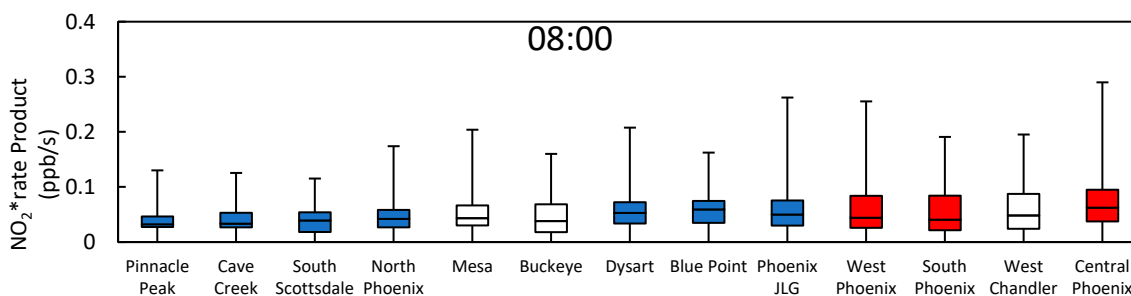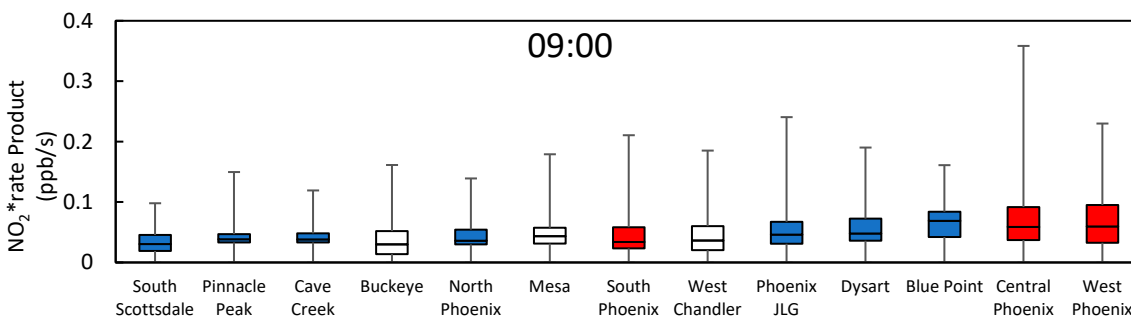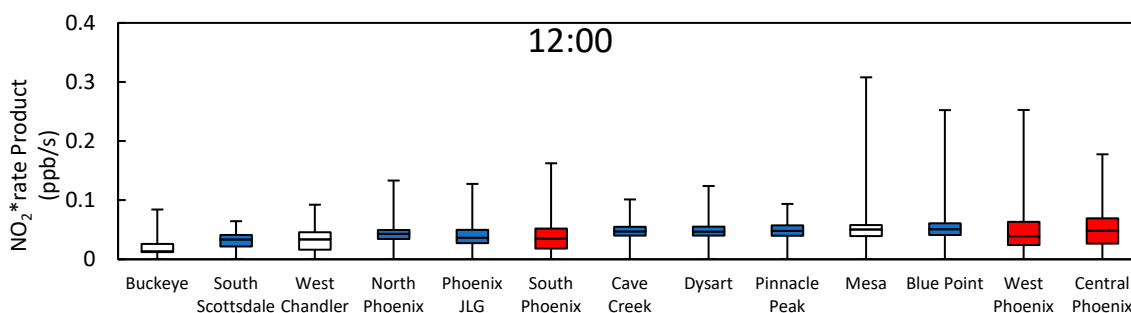

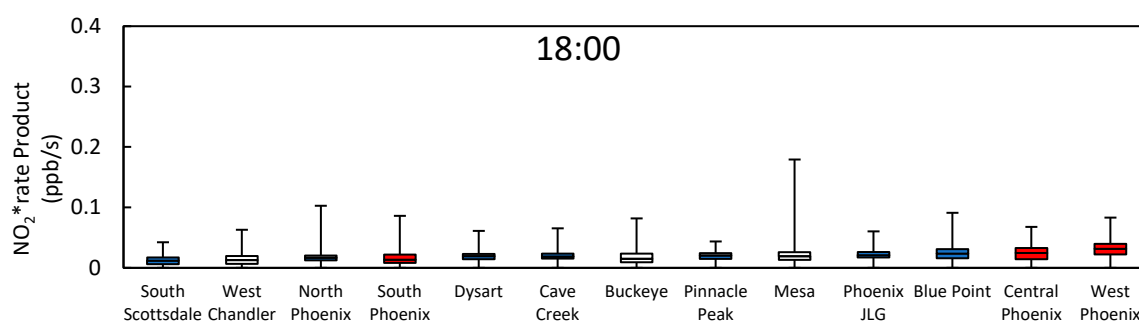

**Figure S3.** Box and whisker plots for the  $\text{NO}_2 \times \text{rate}$  for the 13 sites at various hours. Red boxes correspond to sites dominated by  $\text{NO}_2$ , blue for sites dominated by ozone, and white for sites that have equivalent  $\text{NO}_2$  and ozone as defined by  $\log \text{NO}_2/\text{O}_3$ . The sites are ordered in terms of increasing 75<sup>th</sup> percentiles. The lines within the boxes represent the medians, the interquartile range is the range of the boxes with the top representing the 75<sup>th</sup> and the bottom the 25<sup>th</sup> percentile. The whiskers represent the maximum and minimum values in the data. The sites are sorted by the 75<sup>th</sup> percentile.

**Table S3.** Average Hourly  $\text{NO}_2$  for each site.

| Hr | WC   | BP   | B    | CP   | WP   | SP   | SS   | PP   | NP   | D    | M    | CC  | JLG  |
|----|------|------|------|------|------|------|------|------|------|------|------|-----|------|
| 0  | 14.6 | 13.6 | 8.9  | 15.2 | 14.4 | 12.4 | 14.1 | 12.1 | 12.4 | 9.5  | 13.1 | 8.4 | 10.1 |
| 1  | 14.9 | 12.6 | 8.5  | 15.3 | 14.8 | 12.8 | 14.0 | 10.8 | 11.6 | 9.2  | 12.7 | 8.2 | 9.1  |
| 2  | 14.4 | 12.2 | 9.0  | 15.3 | 15.8 | 13.1 | 13.6 | 11.1 | 11.6 | 9.6  | 13.1 | 8.1 | 7.9  |
| 3  | 14.1 | 12.5 | 8.6  | 16.4 | 15.8 | 13.7 | 13.3 | 10.8 | 11.8 | 9.5  | 12.5 | 8.1 | 7.9  |
| 4  | 14.2 | 12.4 | 9.0  | 18.7 | 17.7 | 15.5 | 13.7 | 10.5 | 12.8 | 10.4 | 12.7 | 8.0 | 8.8  |
| 5  | 15.8 | 12.9 | 10.4 | 21.1 | 20.9 | 17.9 | 15.3 | 11.0 | 15.5 | 11.5 | 13.4 | 8.0 | 11.1 |
| 6  | 16.8 | 12.1 | 11.9 | 18.0 | 19.4 | 17.9 | 16.4 | 12.6 | 15.4 | 11.4 | 13.0 | 7.8 | 11.8 |
| 7  | 12.3 | 7.8  | 9.1  | 11.9 | 12.2 | 9.7  | 10.7 | 6.1  | 10.7 | 10.9 | 9.7  | 6.0 | 10.3 |
| 8  | 7.8  | 5.9  | 7.1  | 8.8  | 9.9  | 8.0  | 7.4  | 5.2  | 7.1  | 8.3  | 7.4  | 5.9 | 8.4  |
| 9  | 5.8  | 5.6  | 5.9  | 6.7  | 7.2  | 6.4  | 5.9  | 4.7  | 6.5  | 7.5  | 5.5  | 4.7 | 6.4  |
| 10 | 4.7  | 5.4  | 5.0  | 5.8  | 5.4  | 5.5  | 5.9  | 4.6  | 6.4  | 6.8  | 4.6  | 4.3 | 5.4  |
| 11 | 4.7  | 5.1  | 5.0  | 5.7  | 4.9  | 5.4  | 6.0  | 4.6  | 6.4  | 6.3  | 4.4  | 4.4 | 4.6  |
| 12 | 4.8  | 5.0  | 4.3  | 5.3  | 5.4  | 5.8  | 5.8  | 4.6  | 7.1  | 5.8  | 4.5  | 4.0 | 3.9  |
| 13 | 4.4  | 5.2  | 4.3  | 4.9  | 5.4  | 5.9  | 5.6  | 4.5  | 7.1  | 6.1  | 4.3  | 3.9 | 3.5  |
| 14 | 4.5  | 4.9  | 4.3  | 4.6  | 5.2  | 5.9  | 5.7  | 4.8  | 7.7  | 6.1  | 4.3  | 3.9 | 3.3  |
| 15 | 4.5  | 4.8  | 4.3  | 4.6  | 5.2  | 5.9  | 5.1  | 4.3  | 7.4  | 6.1  | 4.5  | 4.0 | 3.4  |
| 16 | 4.2  | 4.8  | 4.2  | 4.3  | 5.4  | 5.7  | 5.1  | 4.5  | 7.5  | 6.1  | 4.5  | 4.0 | 3.3  |
| 17 | 3.9  | 4.8  | 4.5  | 4.5  | 5.9  | 5.3  | 5.1  | 4.7  | 7.1  | 6.2  | 4.5  | 4.1 | 3.7  |
| 18 | 3.9  | 5.3  | 5.6  | 4.7  | 5.7  | 4.7  | 5.6  | 4.2  | 7.3  | 5.9  | 4.2  | 4.4 | 4.5  |
| 19 | 4.3  | 5.7  | 7.4  | 5.9  | 7.1  | 5.4  | 6.7  | 4.6  | 7.4  | 6.6  | 3.9  | 5.2 | 7.5  |
| 20 | 12.0 | 12.3 | 10.0 | 12.5 | 15.2 | 12.7 | 12.2 | 12.5 | 11.8 | 9.9  | 10.1 | 9.4 | 11.9 |
| 21 | 12.8 | 11.9 | 9.6  | 14.4 | 17.4 | 13.4 | 14.2 | 14.3 | 14.5 | 10.5 | 11.8 | 8.9 | 13.9 |
| 22 | 13.7 | 12.3 | 9.8  | 16.0 | 17.2 | 12.8 | 14.9 | 13.8 | 14.9 | 9.8  | 13.1 | 8.7 | 13.2 |
| 23 | 13.3 | 13.0 | 8.9  | 15.5 | 15.7 | 12.4 | 15.5 | 12.3 | 14.0 | 9.5  | 13.5 | 8.0 | 11.7 |

**Table S4.** Average Hourly FEM  $\text{O}_3$  for each site.

| Hr | WC   | BP   | B    | CP   | WP   | SP   | SS   | PP   | NP   | D    | M    | CC   | JLG  |
|----|------|------|------|------|------|------|------|------|------|------|------|------|------|
| 0  | 32.0 | 28.6 | 25.8 | 29.7 | 29.7 | 28.1 | 31.3 | 41.4 | 35.2 | 36.7 | 33.8 | 42.1 | 33.2 |
| 1  | 29.8 | 27.9 | 24.4 | 28.8 | 29.4 | 26.2 | 30.1 | 40.6 | 34.5 | 36.0 | 33.2 | 40.6 | 32.2 |
| 2  | 29.0 | 26.4 | 22.8 | 28.3 | 28.1 | 24.7 | 29.0 | 40.0 | 33.7 | 33.9 | 31.5 | 39.3 | 29.9 |
| 3  | 28.2 | 25.2 | 20.5 | 26.0 | 26.3 | 22.7 | 27.9 | 39.5 | 32.6 | 32.3 | 30.3 | 38.4 | 29.9 |
| 4  | 26.1 | 24.1 | 18.4 | 21.6 | 22.5 | 19.4 | 26.2 | 39.4 | 29.7 | 29.1 | 28.4 | 37.4 | 27.4 |

|    |      |      |      |      |      |      |      |      |      |      |      |      |      |
|----|------|------|------|------|------|------|------|------|------|------|------|------|------|
| 5  | 22.8 | 22.3 | 15.5 | 16.5 | 17.1 | 15.3 | 23.2 | 37.8 | 24.9 | 25.5 | 24.9 | 35.5 | 24.2 |
| 6  | 22.4 | 24.4 | 16.0 | 19.7 | 18.9 | 15.8 | 23.0 | 36.9 | 25.5 | 25.2 | 24.9 | 36.2 | 24.0 |
| 7  | 27.9 | 30.5 | 23.1 | 27.5 | 26.6 | 24.3 | 29.8 | 41.7 | 32.8 | 31.6 | 31.6 | 39.4 | 30.3 |
| 8  | 35.3 | 36.8 | 33.3 | 34.2 | 33.7 | 32.3 | 37.9 | 45.5 | 40.7 | 39.2 | 39.2 | 43.7 | 38.0 |
| 9  | 42.9 | 42.6 | 40.3 | 41.3 | 41.3 | 39.4 | 44.8 | 48.7 | 47.6 | 45.5 | 46.5 | 47.3 | 46.0 |
| 10 | 49.3 | 46.3 | 46.5 | 47.8 | 47.6 | 46.5 | 51.2 | 52.4 | 53.7 | 51.7 | 52.6 | 51.9 | 53.2 |
| 11 | 54.0 | 49.7 | 50.6 | 53.9 | 53.4 | 51.6 | 56.4 | 56.4 | 58.6 | 56.8 | 57.5 | 55.7 | 59.2 |
| 12 | 56.9 | 52.9 | 52.8 | 58.1 | 57.4 | 54.4 | 60.8 | 60.2 | 62.5 | 60.0 | 61.7 | 58.7 | 64.1 |
| 13 | 58.8 | 55.7 | 53.6 | 61.3 | 59.3 | 56.1 | 63.7 | 63.3 | 65.5 | 61.1 | 64.2 | 61.2 | 66.9 |
| 14 | 58.9 | 57.9 | 53.6 | 62.1 | 59.6 | 56.5 | 64.8 | 65.3 | 66.9 | 61.1 | 64.9 | 63.0 | 67.4 |
| 15 | 59.1 | 58.9 | 53.2 | 61.7 | 58.7 | 56.5 | 65.1 | 66.2 | 67.0 | 60.5 | 65.1 | 63.2 | 66.7 |
| 16 | 59.1 | 58.8 | 52.7 | 60.7 | 56.6 | 56.1 | 64.0 | 66.8 | 65.0 | 59.3 | 64.6 | 62.3 | 64.3 |
| 17 | 58.3 | 58.4 | 51.0 | 58.1 | 54.5 | 54.3 | 62.2 | 65.8 | 61.9 | 57.9 | 63.2 | 60.5 | 60.8 |
| 18 | 57.1 | 57.2 | 46.8 | 54.3 | 51.8 | 51.4 | 58.0 | 62.6 | 58.3 | 56.2 | 60.0 | 58.2 | 57.0 |
| 19 | 52.5 | 49.4 | 40.3 | 49.6 | 45.6 | 45.9 | 51.6 | 56.0 | 52.7 | 51.5 | 55.1 | 53.2 | 50.0 |
| 20 | 45.9 | 40.8 | 35.5 | 42.5 | 36.4 | 36.1 | 44.1 | 47.5 | 44.4 | 45.4 | 47.7 | 47.4 | 41.1 |
| 21 | 40.7 | 36.3 | 30.9 | 36.2 | 30.7 | 32.1 | 38.0 | 44.2 | 37.1 | 41.9 | 41.9 | 45.5 | 35.4 |
| 22 | 36.4 | 33.4 | 28.2 | 32.3 | 29.2 | 30.2 | 34.2 | 42.2 | 34.2 | 40.4 | 37.5 | 44.8 | 33.3 |
| 23 | 34.7 | 30.4 | 27.0 | 31.6 | 29.4 | 29.4 | 32.3 | 41.9 | 34.5 | 38.2 | 35.2 | 43.8 | 33.4 |

### Wildfire Impact on Ozone Formation

The following days have been identified by Maricopa County as possibly impacted by regional transport of wildfire smoke. Comparison of the ozone formation between smoke days and non-smoke days allows comparison of the photochemical impact of regional transport of wildfire smoke.

- 06/15, 06/16, 06/18, 06/24, 06/26, 06/28, 06/29, 07/01, 07/02, 07/04, 07/08, 07/09, 07/13, 07/14, 07/17, 07/19, 07/20, 07/21, 07/22, 07/27, 07/28, 07/30, 07/31, 08/01, 08/02, 08/03, 08/04, 08/05, 08/06, 08/17, 08/24, 08/25, 08/26, 08/27, 08/28, 08/29, 09/03, 09/04, 09/05

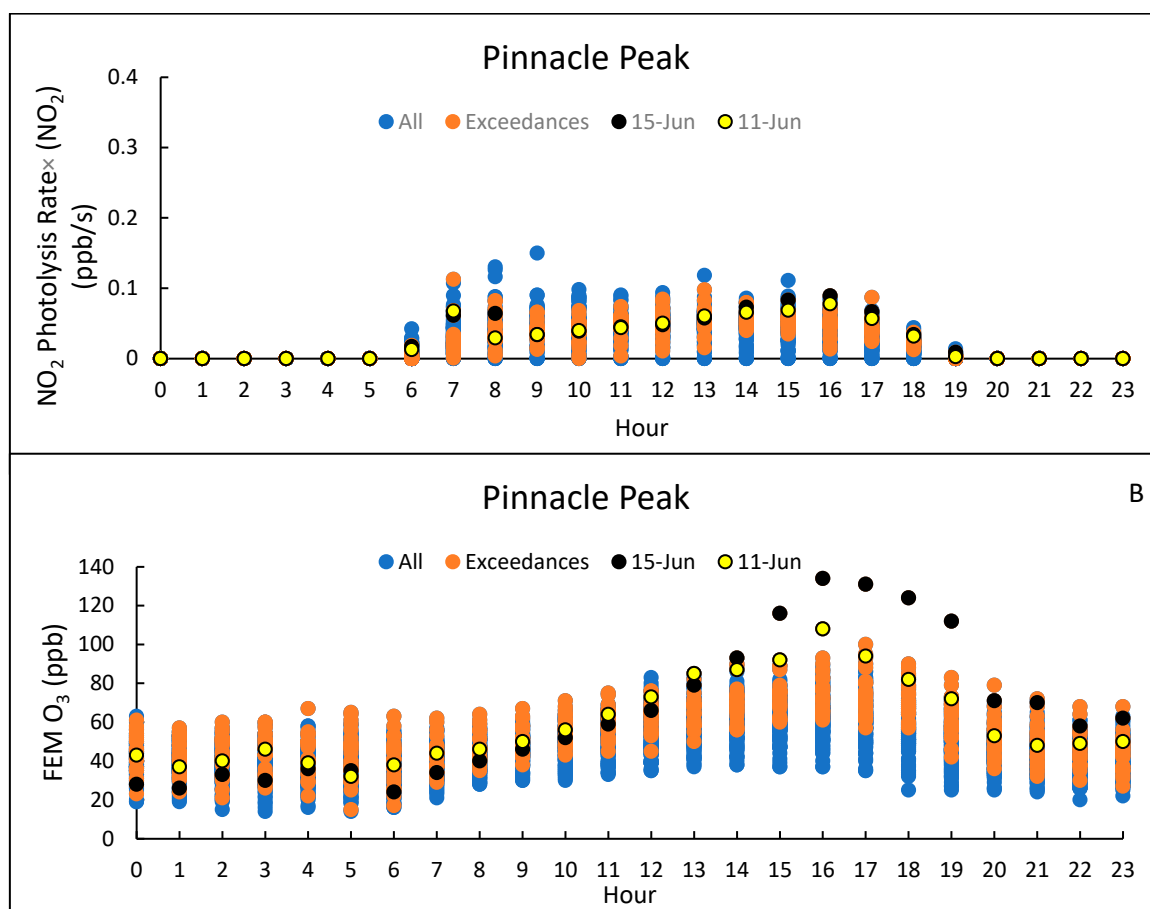

**Figure S4.** NO<sub>2</sub> × Rate (A) and O<sub>3</sub> (B) values versus hour for Pinnacle Peak for all days, ozone exceedance days, 06/11, and 06/15.



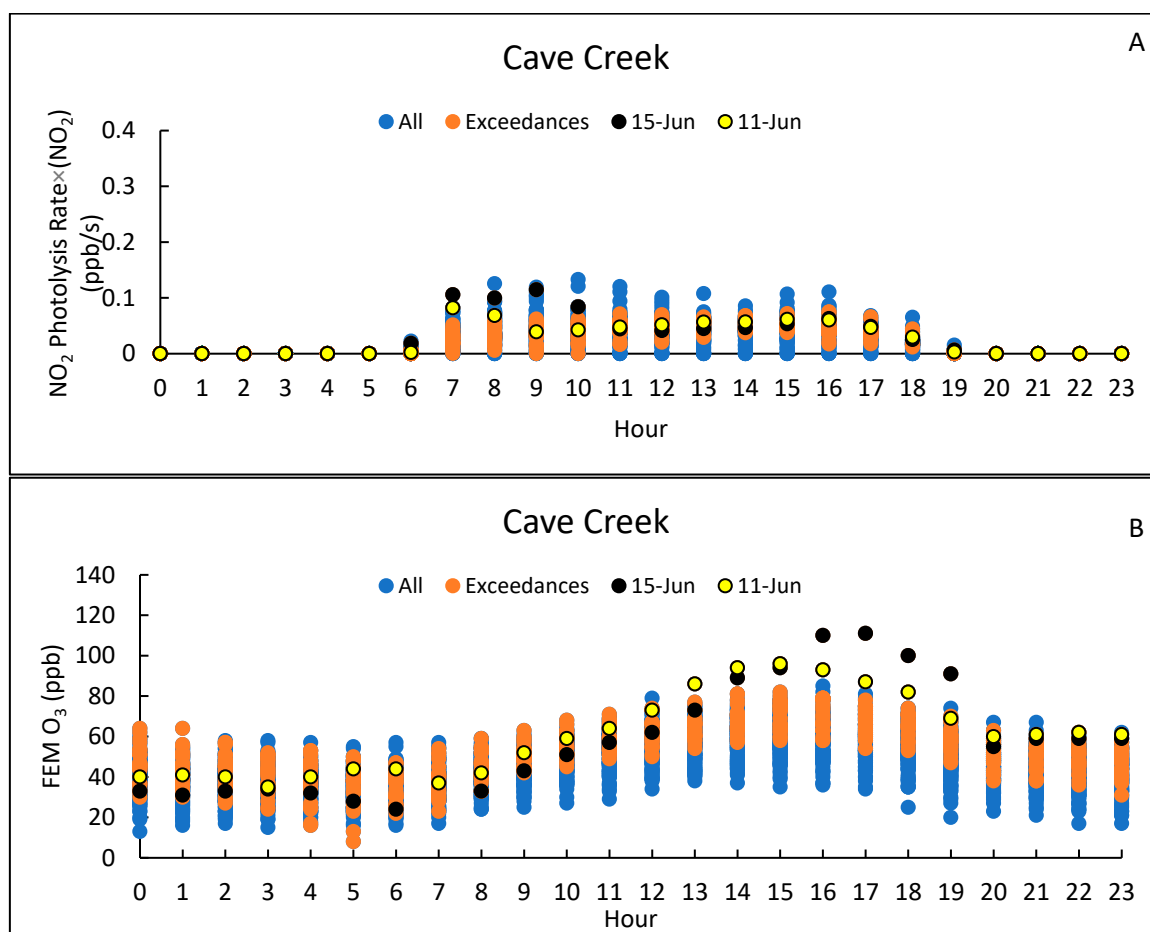

**Figure S5.** NO<sub>2</sub> × Rate (A) and O<sub>3</sub> (B) values versus hour for Cave Creek for all days, ozone exceedance days, 06/11, and 06/15.

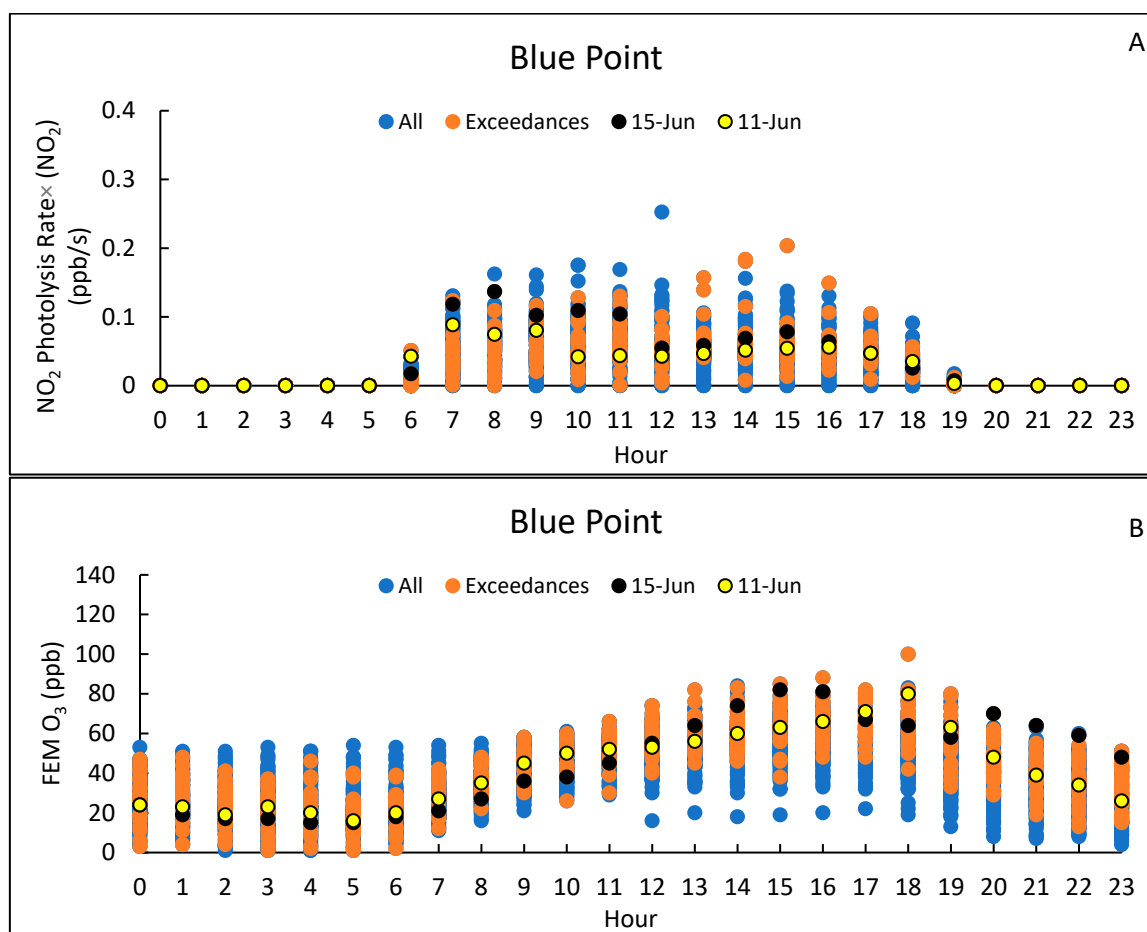

**Figure S6.** NO<sub>2</sub>× Rate (A) and O<sub>3</sub> (B) values versus hour for Blue Point for all days, ozone exceedance days, 06/11, and 06/15.

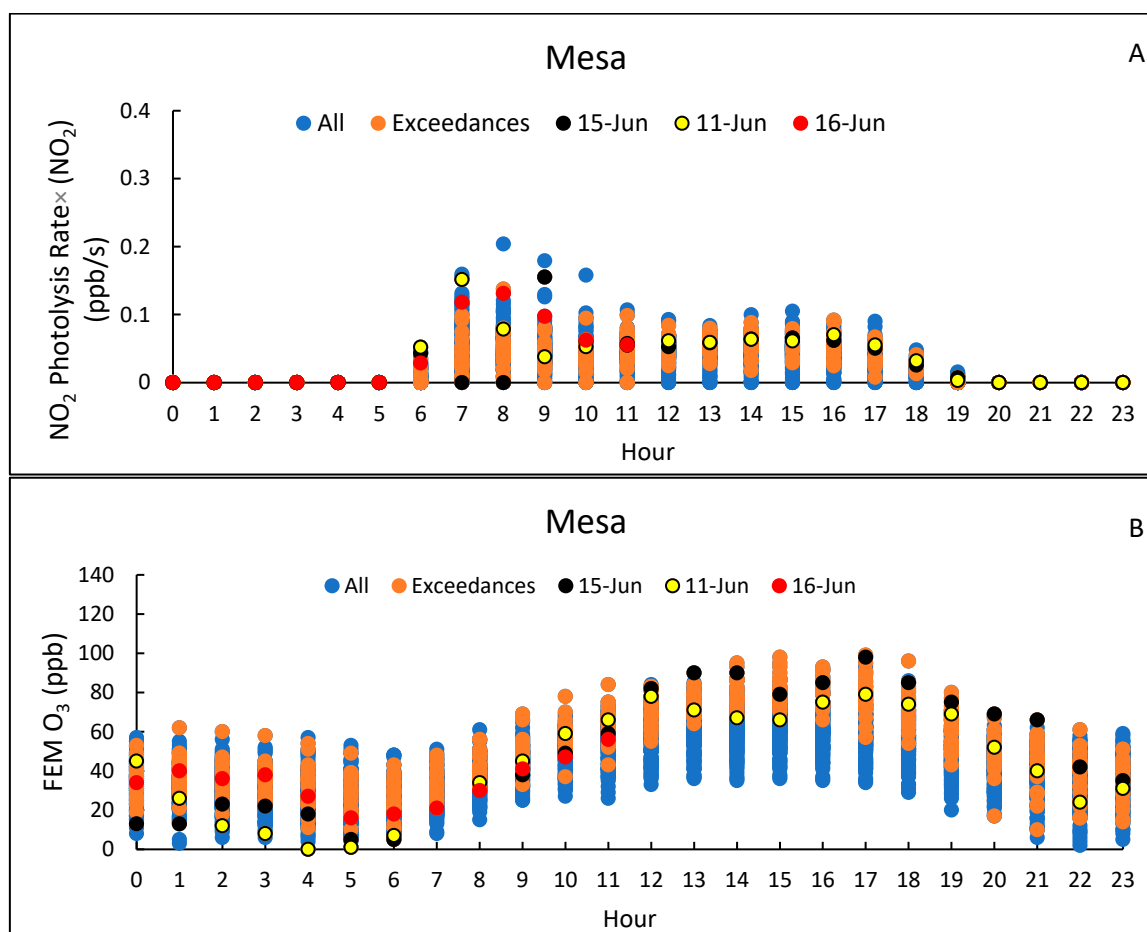

**Figure S7.** NO<sub>2</sub> × Rate (A) and O<sub>3</sub> (B) values versus hour for Mesa for all days, ozone exceedance days, 06/11, and 06/15. 06/15 07:00 and 08:00 FEM O<sub>3</sub> values were thrown out by MCAQD. Data in red is from 06/16 which was missing FEM O<sub>3</sub> values so the NO<sub>2</sub> data also needs to be nullified.

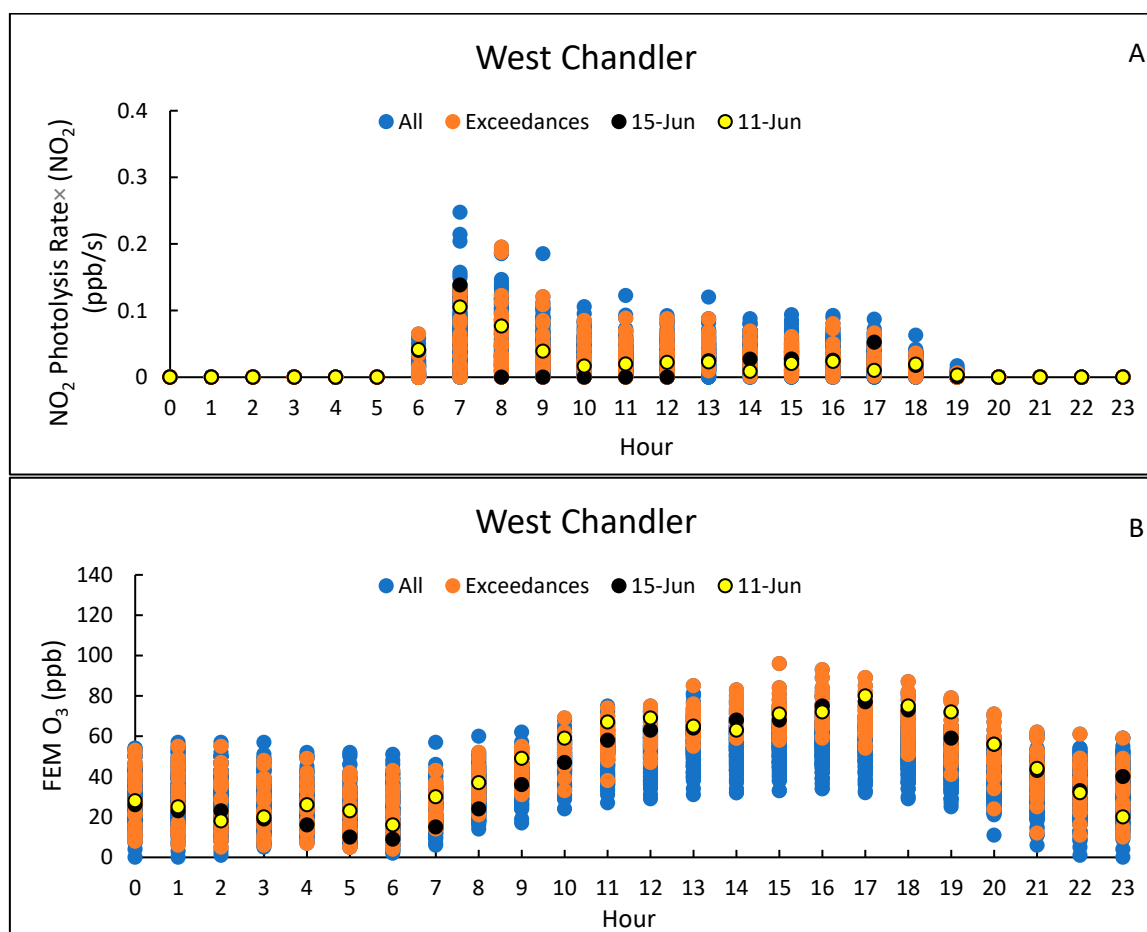

**Figure S8.** NO<sub>2</sub> × Rate (A) and O<sub>3</sub> (B) values versus hour for West Chandler for all days, ozone exceedance days, 06/11, and 06/15. 06/15 08:00 and 12:00 NO<sub>2</sub> values are N/A due to sensor rotations.

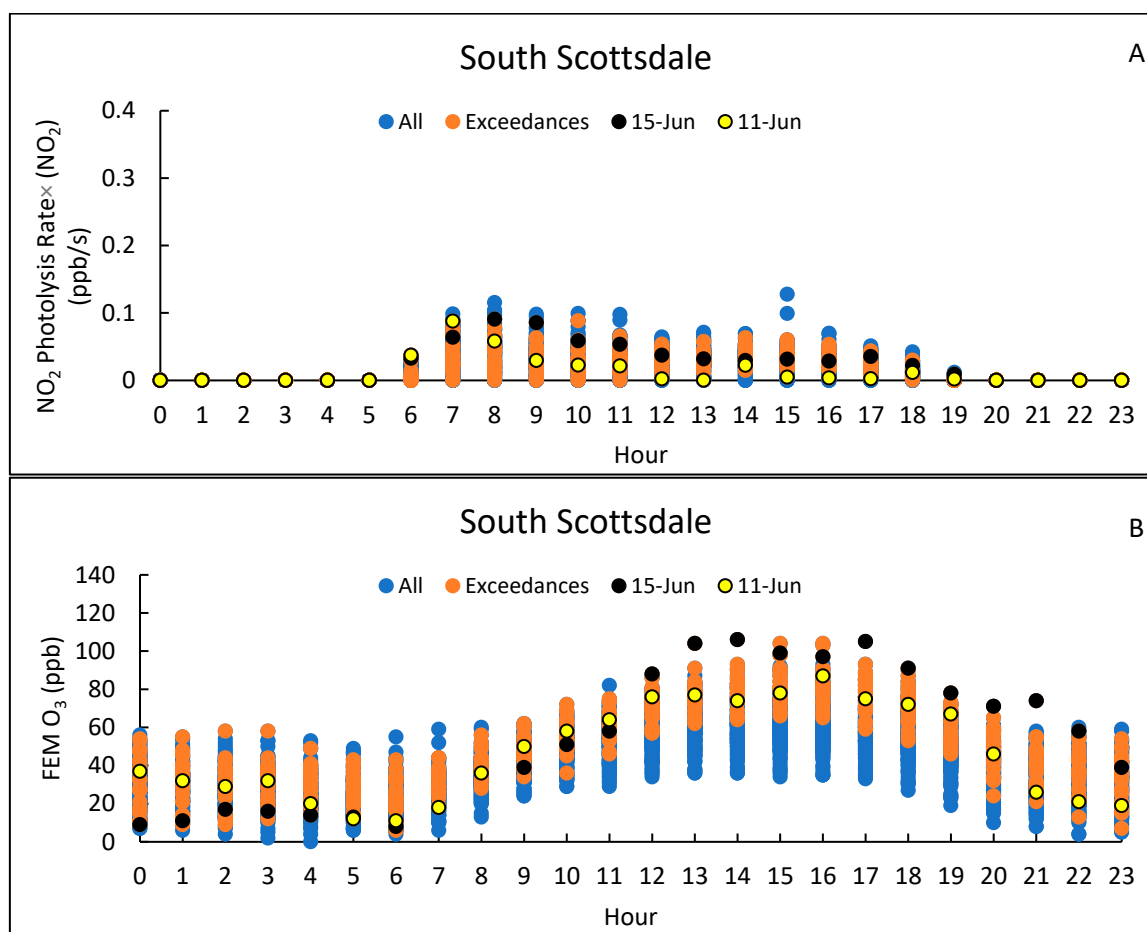

**Figure S9.**  $\text{NO}_2 \times \text{Rate}$  (A) and  $\text{O}_3$  (B) values versus hour for South Scottsdale for all days, ozone exceedance days, 06/11, and 06/15.

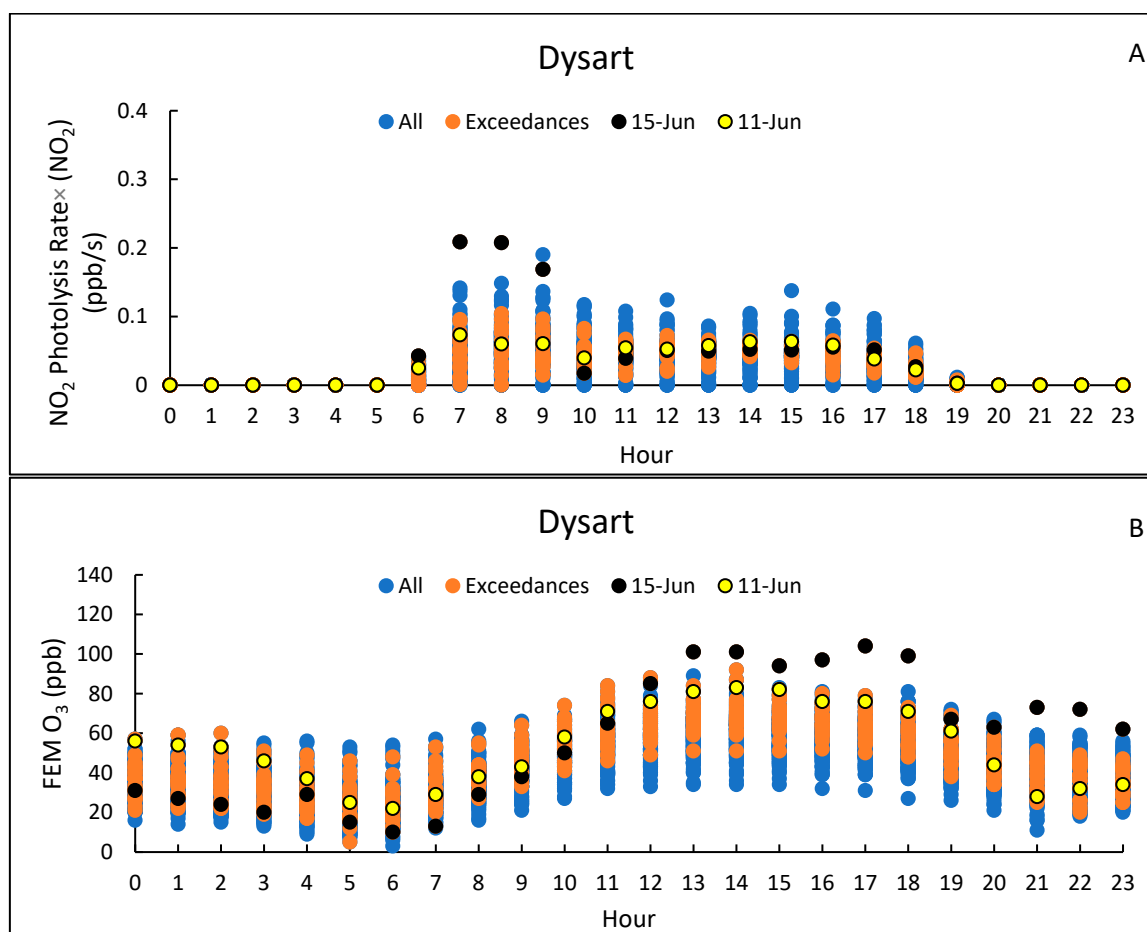

**Figure S10.** NO<sub>2</sub> × Rate (A) and O<sub>3</sub> (B) values versus hour for Dysart for all days, ozone exceedance days, 06/11, and 06/15.

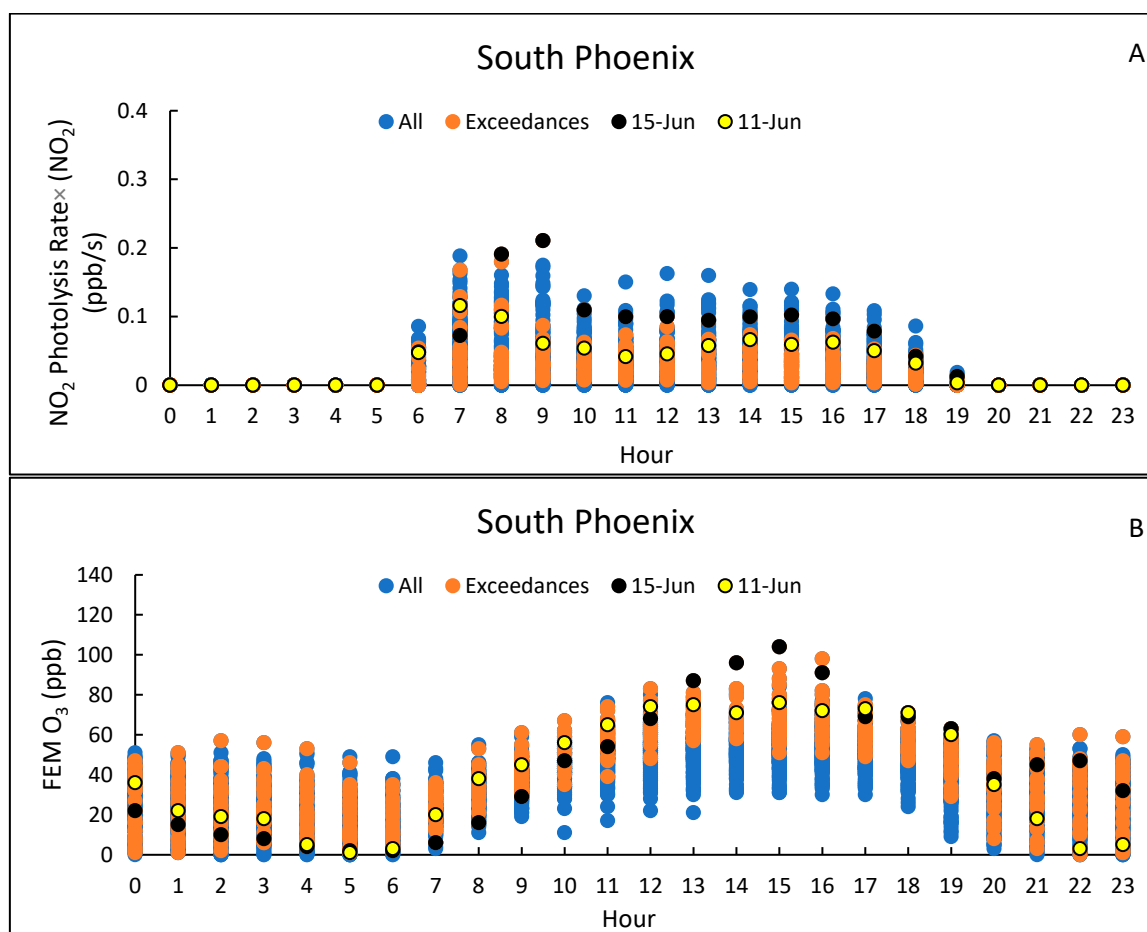

**Figure S11.** NO<sub>2</sub> × Rate (A) and O<sub>3</sub> (B) values versus hour for South Phoenix for all days, ozone exceedance days, 06/11, and 06/15.

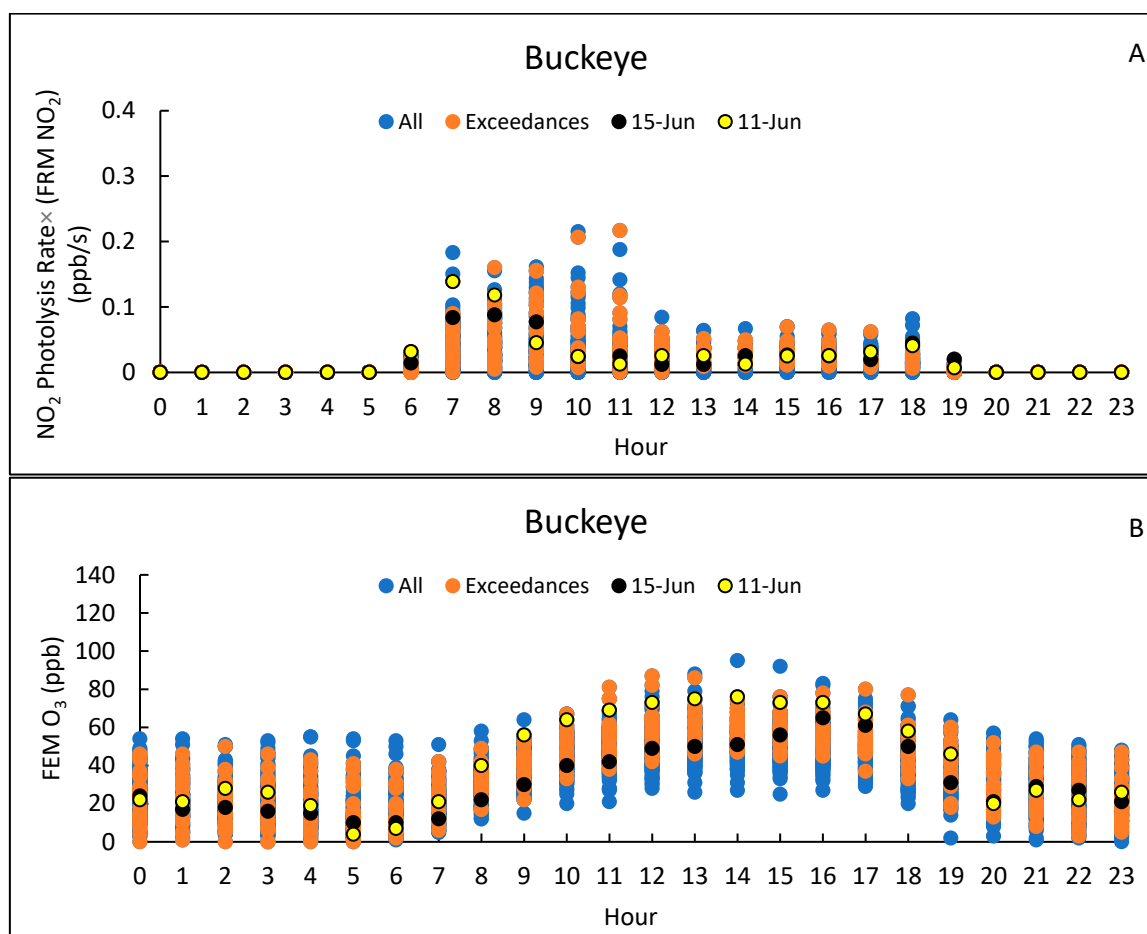

**Figure S12.** NO<sub>2</sub> × Rate (A) and O<sub>3</sub> (B) values versus hour for Buckeye for all days, ozone exceedance days, 06/11, and 06/15.

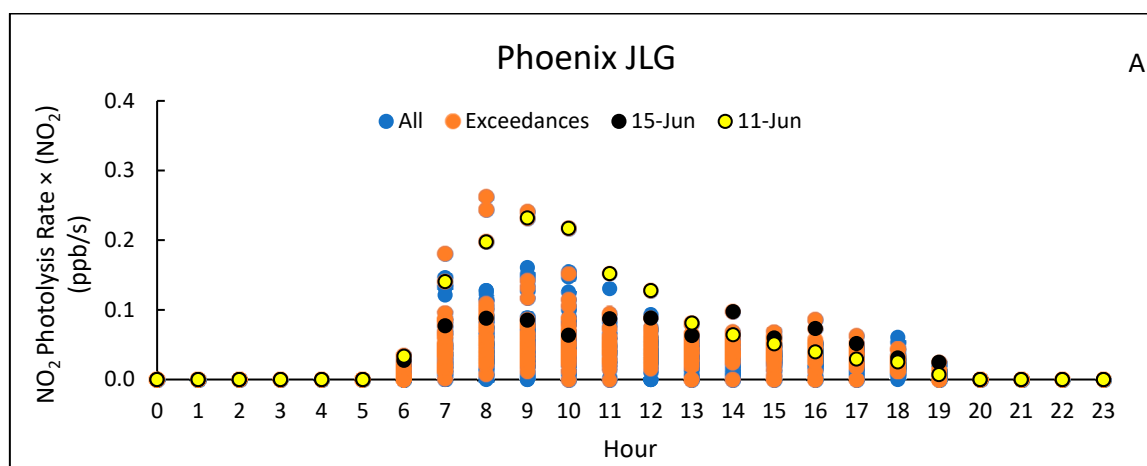



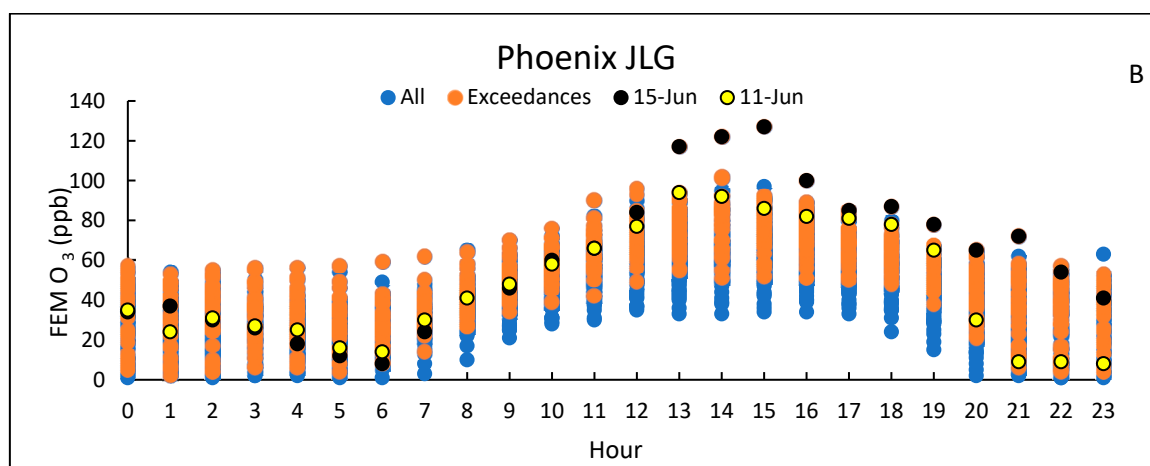

**Figure S13.** NO<sub>2</sub> × Rate (A) and O<sub>3</sub> (B) values versus hour for Phoenix JLG for all days, ozone exceedance days, 06/11, and 06/15.

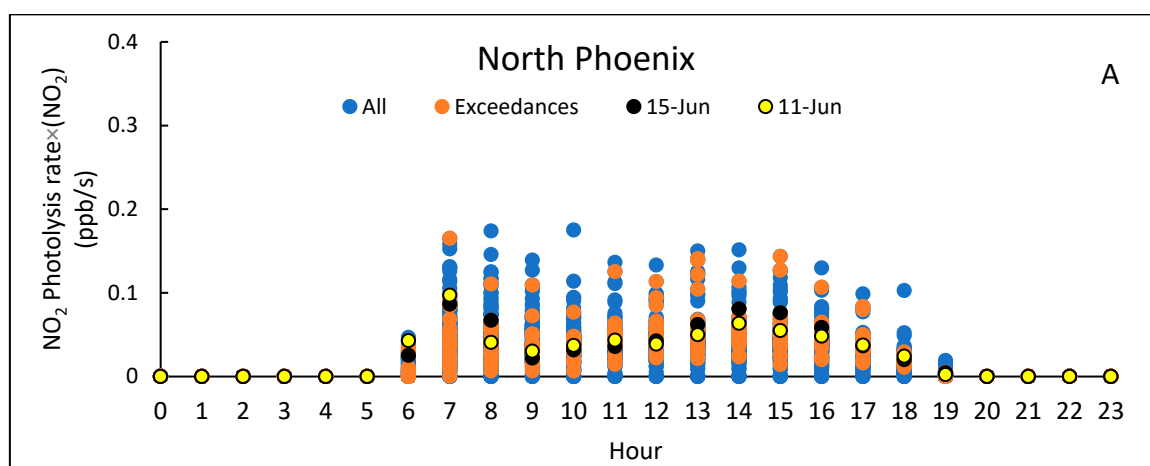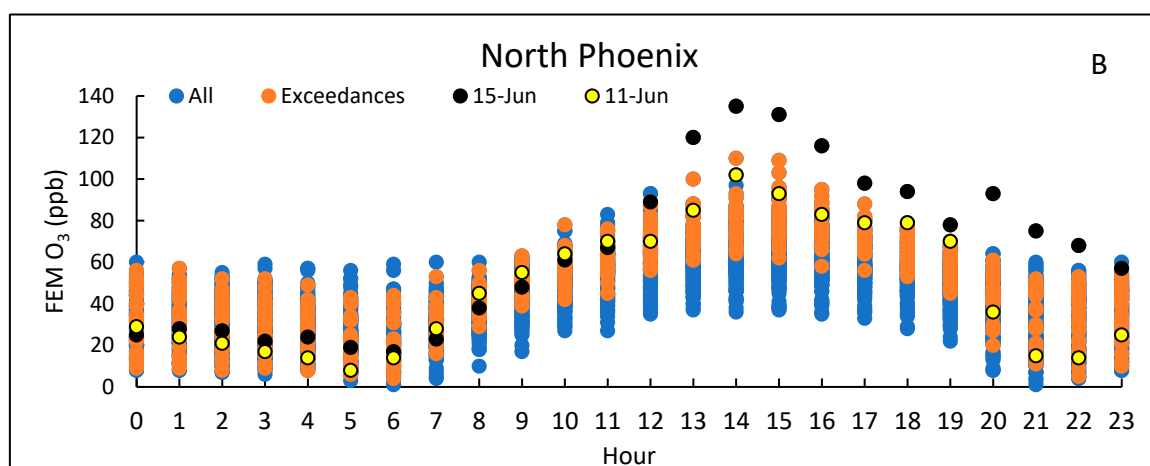

**Figure S14.** NO<sub>2</sub> × Rate (A) and O<sub>3</sub> (B) values versus hour for North Phoenix for all days, ozone exceedance days, 06/11, and 06/15.

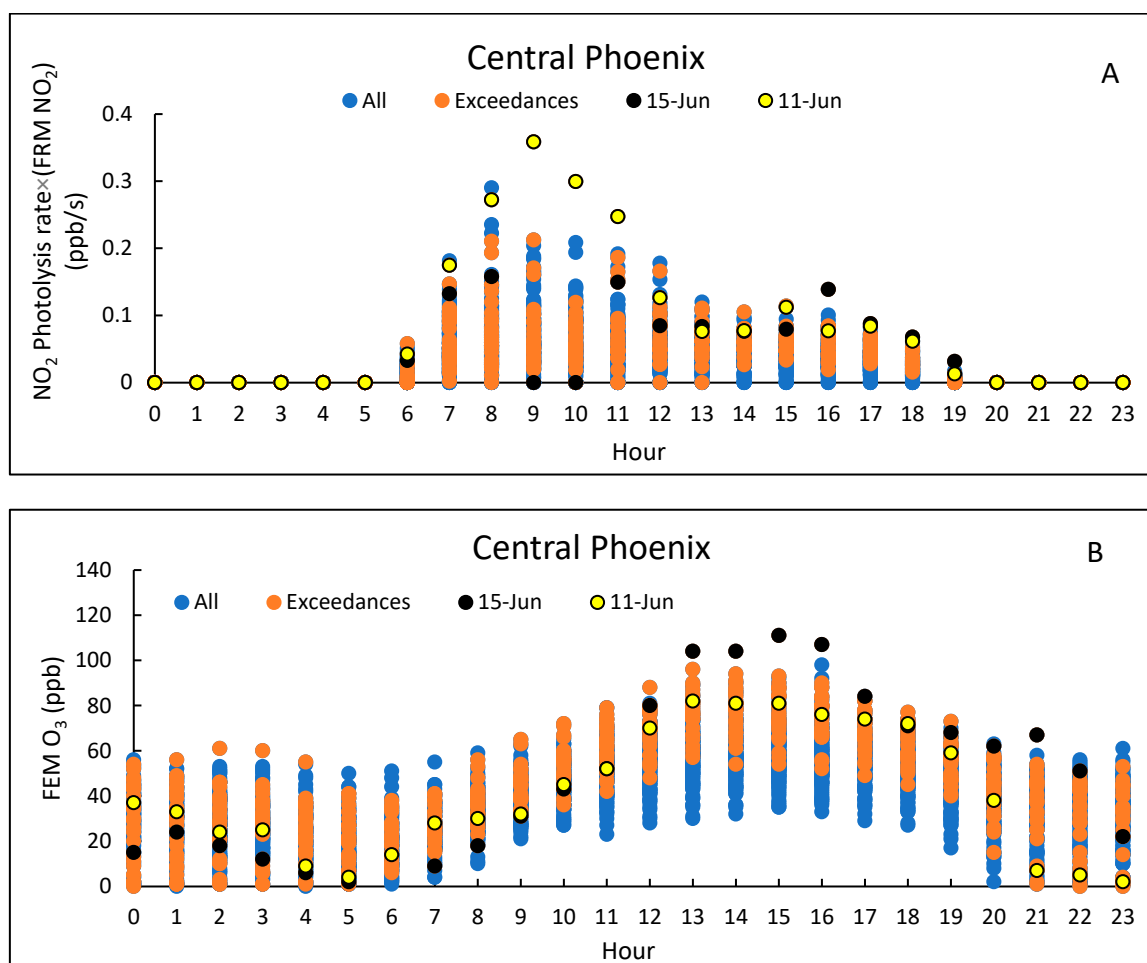

**Figure S15.** NO<sub>2</sub> × Rate (A) and O<sub>3</sub> (B) values versus hour for Central Phoenix for all days, ozone exceedance days, 06/11, and 06/15.

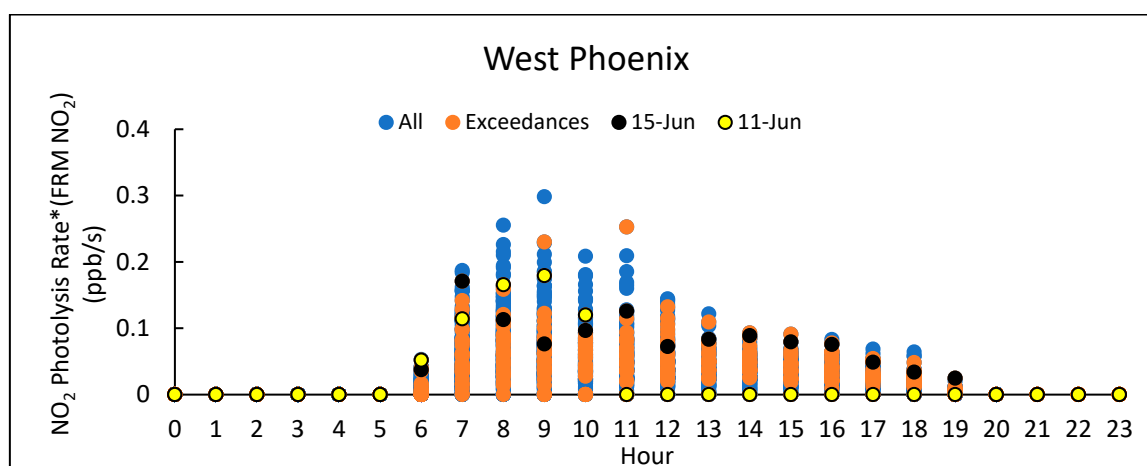

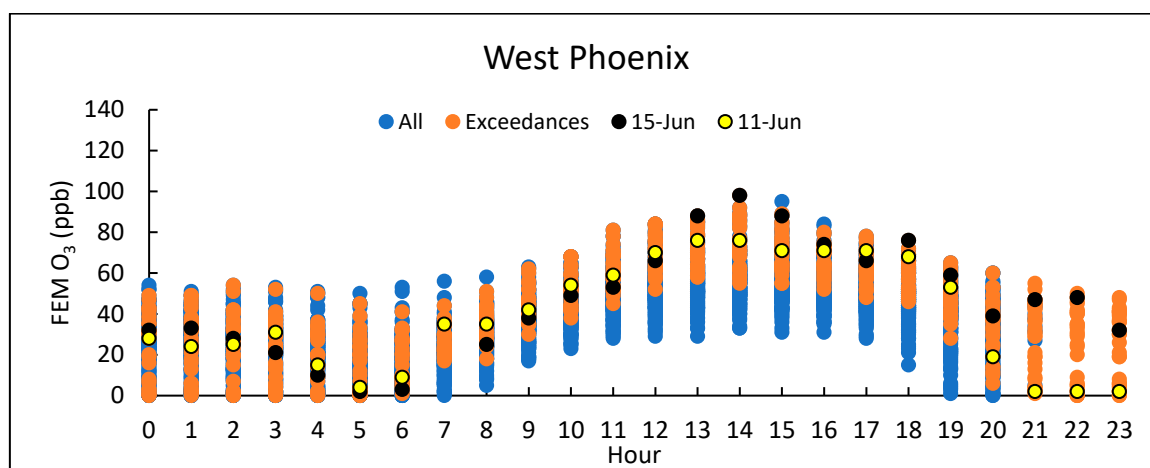

**Figure S16.**  $\text{NO}_2 \times \text{Rate}$  (A) and  $\text{O}_3$  (B) values versus hour for West Phoenix for all days, ozone exceedance days, 06/11, and 06/15.

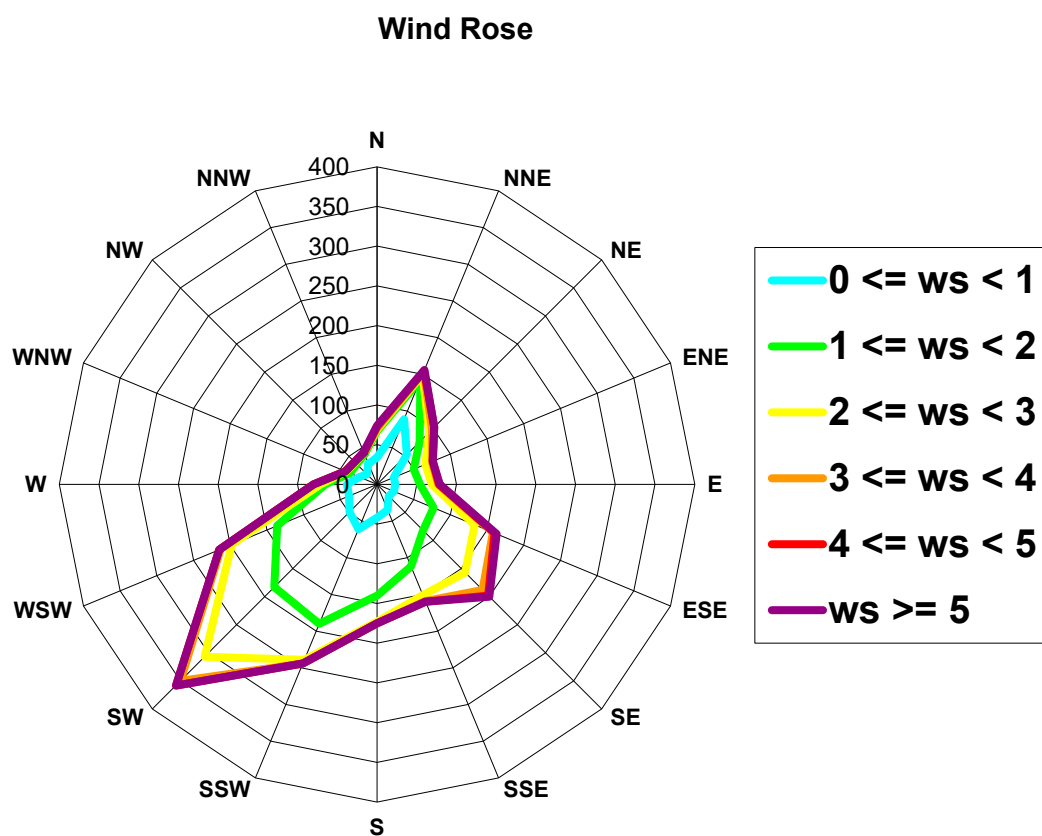

**Figure S17.** Wind Rose for the North Phoenix site, wind speed in knots.

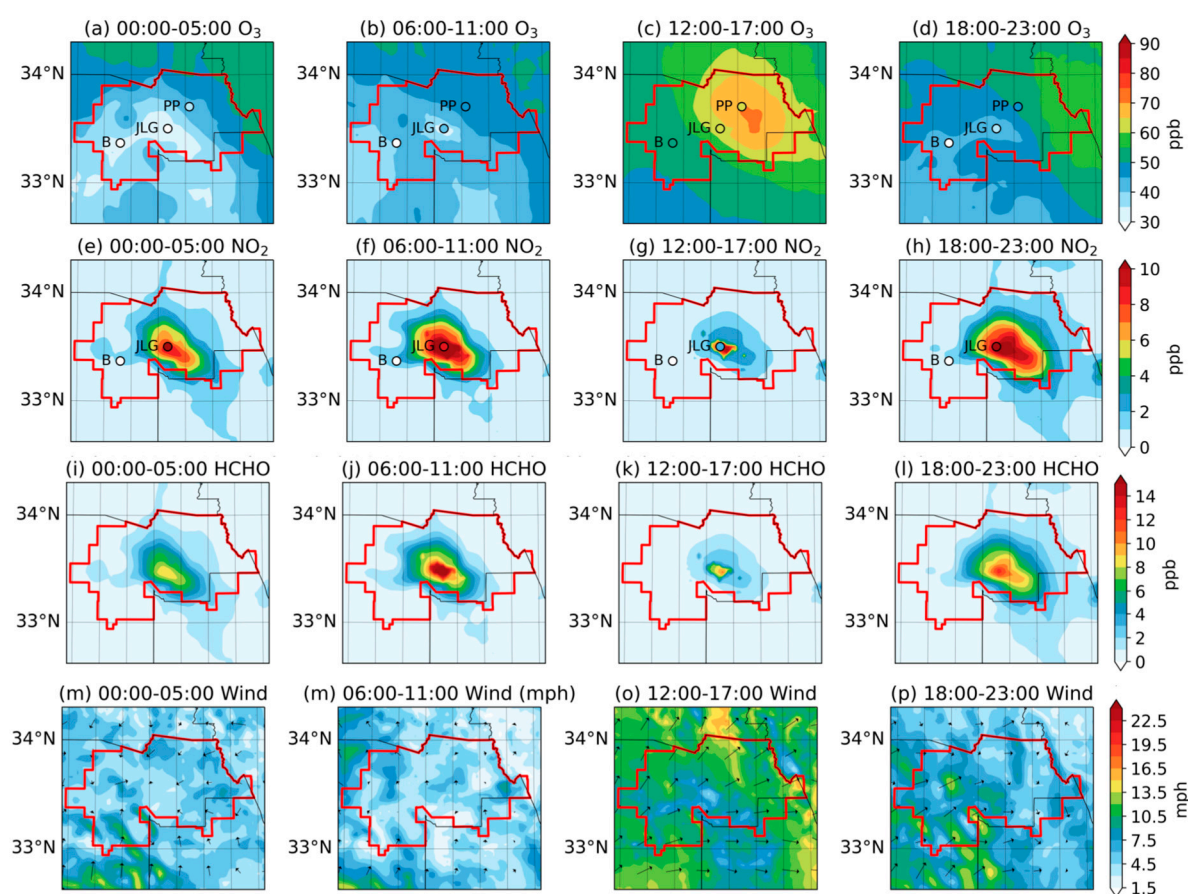

**Figure S18.** WRF-Chem simulated monthly mean of hourly O<sub>3</sub>, NO<sub>2</sub>, HCHO, and wind speed/direction averaged over 6 hours' time period during the day: 00:00-05:00, 06:00-11:00, 12:00-17:00, 18:00-23:00 in June 2021. AQS observations over sites including JLG Supersite (JLG), Buckeye (B), and Pinnacle Peak (PP). EPA's Ozone non-attainment area over Phoenix-Mesa is bounded by red lines.

**Table S5.** Correlation coefficients between morning NO<sub>2</sub> × Rate (row) and afternoon O<sub>3</sub> (column) for the whole deployment period for all site combinations with the peak hour listed to site abbreviation. Significant correlation coefficients ( $p < 0.05$ ) are in bold and insignificant in italics ( $n = 154$ ).

| Total                          | CP<br>O <sub>3</sub><br>14 | WP<br>14   | SP<br>15   | NP<br>14   | B 13       | BP<br>15   | WC<br>16   | SS<br>16   | PP<br>17   | CC<br>16   | D 14       | M<br>15    | JLG 14     |
|--------------------------------|----------------------------|------------|------------|------------|------------|------------|------------|------------|------------|------------|------------|------------|------------|
| CP<br>NO <sub>2</sub> × Rate 8 | .14                        | .10        | <b>.21</b> | <b>.31</b> | <b>.26</b> | <b>.30</b> | <b>.18</b> | <b>.14</b> | <b>.36</b> | <b>.41</b> | <b>.27</b> | <b>.13</b> | <b>.18</b> |
| WP 9                           | .07                        | .10        | .14        | <b>.23</b> | <b>.27</b> | <b>.25</b> | .16        | .10        | <b>.30</b> | <b>.40</b> | <b>.23</b> | .13        | .14        |
| SP 8                           | .02                        | -.05       | .08        | <b>.17</b> | .09        | <b>.24</b> | .05        | -.03       | <b>.21</b> | <b>.17</b> | .07        | .01        | .08        |
| NP 7                           | .12                        | .05        | <b>.16</b> | <b>.22</b> | <b>.20</b> | <b>.18</b> | .12        | .07        | <b>.27</b> | <b>.22</b> | <b>.16</b> | .06        | <b>.19</b> |
| B 9                            | <b>.27</b>                 | <b>.27</b> | <b>.28</b> | <b>.33</b> | <b>.44</b> | <b>.17</b> | <b>.26</b> | <b>.29</b> | <b>.33</b> | <b>.33</b> | <b>.36</b> | <b>.26</b> | <b>.20</b> |
| BP 9                           | .14                        | .11        | .06        | .14        | -.06       | .12        | .04        | .11        | .09        | .08        | .06        | .07        | .04        |
| WC 7                           | .04                        | -.03       | .10        | <b>.19</b> | <b>.18</b> | .13        | .11        | -.01       | <b>.24</b> | <b>.23</b> | .14        | .06        | .16        |
| SS 8                           | .02                        | -.03       | .10        | <b>.16</b> | .16        | .16        | .06        | -.01       | <b>.21</b> | <b>.22</b> | .13        | .04        | .12        |

|       |      |            |            |            |            |            |            |            |            |            |            |      |      |
|-------|------|------------|------------|------------|------------|------------|------------|------------|------------|------------|------------|------|------|
| PP 9  | .14  | <b>.16</b> | .03        | <b>.18</b> | -.05       | .14        | .00        | <b>.18</b> | <b>.19</b> | .10        | .01        | .09  | .12  |
| CC 9  | .05  | .01        | -.01       | .13        | -.12       | .03        | -.08       | .03        | .13        | .07        | .02        | -.08 | -.01 |
| D 9   | .01  | .01        | .02        | <b>.16</b> | -.10       | <b>.23</b> | -.06       | .00        | .15        | .10        | .03        | .02  | .01  |
| M 8   | -.01 | -.07       | -.04       | .05        | .05        | <b>.18</b> | -.01       | -.02       | <b>.24</b> | .04        | -.01       | -.01 | .01  |
| JLG 9 | .10  | .11        | <b>.17</b> | <b>.27</b> | <b>.21</b> | <b>.31</b> | <b>.16</b> | .15        | <b>.28</b> | <b>.33</b> | <b>.19</b> | .15  | .16  |

**Table S6.** Correlation coefficients between morning NO<sub>2</sub> × Rate (row) and afternoon O<sub>3</sub> (column) for smoke days for all site combinations with the peak hour listed to site abbreviation. Significant correlation coefficients are in bold and insignificant in italics (n= 39).

| Smoke                             | CP<br>O <sub>3</sub><br>14 | WP<br>14   | SP<br>15   | NP<br>14   | B 13       | BP<br>15   | WC<br>16 | SS<br>16   | PP<br>17   | CC<br>16   | D 14       | M<br>15 | JLG 14     |
|-----------------------------------|----------------------------|------------|------------|------------|------------|------------|----------|------------|------------|------------|------------|---------|------------|
| CP<br>NO <sub>2</sub> ×R<br>ate 8 | -.01                       | -.16       | .11        | .23        | -.12       | .11        | -.02     | -.01       | <b>.36</b> | <b>.32</b> | .05        | -.06    | .07        |
| WP 9                              | -.14                       | -.18       | -.09       | .07        | .21        | .26        | -.08     | -.18       | .31        | <b>.33</b> | .08        | -.04    | -.11       |
| SP 8                              | .25                        | .11        | .20        | <b>.42</b> | -.13       | .24        | -.05     | .16        | <b>.49</b> | <b>.39</b> | .19        | .02     | .33        |
| NP 7                              | .17                        | .11        | .19        | .25        | -.11       | -.08       | -.04     | .19        | .25        | .16        | .19        | -.12    | <b>.34</b> |
| B 9                               | .06                        | .10        | .15        | .16        | <b>.37</b> | -.01       | .08      | .11        | .24        | .15        | .21        | -.09    | .20        |
| BP 9                              | .11                        | .18        | .15        | .22        | -.12       | .25        | -.06     | .17        | .25        | .19        | .08        | -.15    | .31        |
| WC 7                              | .30                        | .12        | .15        | <b>.45</b> | -.17       | .06        | -.02     | .23        | <b>.43</b> | <b>.47</b> | <b>.38</b> | .10     | .32        |
| SS 8                              | .23                        | .15        | .25        | <b>.36</b> | -.13       | .02        | -.09     | .23        | <b>.40</b> | <b>.37</b> | .28        | .00     | .32        |
| PP 9                              | .12                        | .18        | -.06       | .29        | -.16       | .05        | -.12     | .27        | .30        | .07        | -.15       | -.11    | <b>.38</b> |
| CC 9                              | <b>.32</b>                 | .30        | .28        | <b>.57</b> | -.10       | .21        | -.05     | <b>.38</b> | <b>.57</b> | <b>.45</b> | <b>.33</b> | -.15    | <b>.57</b> |
| D 9                               | <b>.40</b>                 | <b>.35</b> | <b>.38</b> | <b>.62</b> | -.16       | <b>.35</b> | .06      | <b>.39</b> | <b>.67</b> | <b>.58</b> | <b>.35</b> | .09     | <b>.55</b> |
| M 8                               | -.13                       | -.18       | -.31       | -.13       | -.17       | -.06       | -.30     | -.07       | -.16       | -.25       | -.16       | -.02    | -.11       |
| JLG 9                             | -.16                       | -.21       | .01        | .13        | .10        | .00        | -.07     | -.10       | <b>.32</b> | .27        | -.06       | -.09    | -.03       |

**Table S7.** Correlation coefficients between morning NO<sub>2</sub> × Rate (row) and afternoon O<sub>3</sub> (column) for non-smoke days for all site combinations with the peak hour listed to site abbreviation. Significant correlation coefficients are in bold and insignificant in italics (n= 115).

| Non-Smoke                     | CP<br>O <sub>3</sub><br>14 | WP<br>14   | SP<br>15   | NP<br>14   | B 13       | BP<br>15   | WC<br>16   | SS<br>16   | PP<br>17   | CC<br>16   | D<br>14    | M<br>15    | JLG 14     |
|-------------------------------|----------------------------|------------|------------|------------|------------|------------|------------|------------|------------|------------|------------|------------|------------|
| CP<br>NO <sub>2</sub> ×Rate 8 | <b>.31</b>                 | <b>.30</b> | <b>.37</b> | <b>.47</b> | <b>.46</b> | <b>.41</b> | <b>.34</b> | <b>.29</b> | <b>.46</b> | <b>.52</b> | <b>.43</b> | <b>.29</b> | <b>.33</b> |
| WP 9                          | <b>.27</b>                 | <b>.32</b> | <b>.34</b> | <b>.43</b> | <b>.36</b> | <b>.36</b> | <b>.34</b> | <b>.29</b> | <b>.43</b> | <b>.53</b> | <b>.37</b> | <b>.30</b> | <b>.32</b> |
| SP 8                          | <b>.21</b>                 | <b>.08</b> | <b>.26</b> | <b>.30</b> | <b>.30</b> | <b>.36</b> | <b>.30</b> | <b>.12</b> | <b>.30</b> | <b>.25</b> | <b>.18</b> | <b>.25</b> | <b>.17</b> |

|       |             |             |             |             |             |            |             |             |             |             |             |             |             |
|-------|-------------|-------------|-------------|-------------|-------------|------------|-------------|-------------|-------------|-------------|-------------|-------------|-------------|
| NP 7  | <b>.38</b>  | <b>.25</b>  | <b>.40</b>  | <b>.48</b>  | <b>.41</b>  | <b>.32</b> | <b>.37</b>  | <b>.28</b>  | <b>.49</b>  | <b>.48</b>  | <b>.33</b>  | <b>.32</b>  | <b>.34</b>  |
| B 9   | <b>.34</b>  | <b>.33</b>  | <b>.31</b>  | <b>.41</b>  | <b>.44</b>  | <b>.25</b> | <b>.30</b>  | <b>.35</b>  | <b>.35</b>  | <b>.38</b>  | <b>.41</b>  | <b>.36</b>  | <b>.18</b>  |
| BP 9  | <b>.19</b>  | <b>.11</b>  | <b>.04</b>  | <b>.13</b>  | <b>-.06</b> | <b>.09</b> | <b>.06</b>  | <b>.11</b>  | <b>.04</b>  | <b>.05</b>  | <b>.05</b>  | <b>.13</b>  | <b>-.04</b> |
| WC 7  | <b>.30</b>  | <b>.19</b>  | <b>.38</b>  | <b>.42</b>  | <b>.43</b>  | <b>.27</b> | <b>.41</b>  | <b>.21</b>  | <b>.44</b>  | <b>.38</b>  | <b>.29</b>  | <b>.34</b>  | <b>.35</b>  |
| SS 8  | <b>.24</b>  | <b>.13</b>  | <b>.30</b>  | <b>.35</b>  | <b>.39</b>  | <b>.40</b> | <b>.34</b>  | <b>.17</b>  | <b>.37</b>  | <b>.35</b>  | <b>.26</b>  | <b>.31</b>  | <b>.26</b>  |
| PP 9  | <b>.14</b>  | <b>.15</b>  | <b>.02</b>  | <b>.12</b>  | <b>-.03</b> | <b>.16</b> | <b>-.01</b> | <b>.15</b>  | <b>.12</b>  | <b>.09</b>  | <b>.05</b>  | <b>.15</b>  | <b>.00</b>  |
| CC 9  | <b>-.02</b> | <b>-.11</b> | <b>-.15</b> | <b>-.03</b> | <b>-.15</b> | <b>.01</b> | <b>-.12</b> | <b>-.08</b> | <b>-.03</b> | <b>-.04</b> | <b>-.11</b> | <b>-.07</b> | <b>-.24</b> |
| D 9   | <b>.11</b>  | <b>.07</b>  | <b>.06</b>  | <b>.20</b>  | <b>.01</b>  | <b>.33</b> | <b>.06</b>  | <b>.08</b>  | <b>.11</b>  | <b>.08</b>  | <b>.04</b>  | <b>.23</b>  | <b>-.04</b> |
| M 8   | <b>.20</b>  | <b>.10</b>  | <b>.19</b>  | <b>.28</b>  | <b>.18</b>  | <b>.32</b> | <b>.21</b>  | <b>.15</b>  | <b>.24</b>  | <b>.18</b>  | <b>.15</b>  | <b>.19</b>  | <b>.16</b>  |
| JLG 9 | <b>.23</b>  | <b>.26</b>  | <b>.29</b>  | <b>.41</b>  | <b>.28</b>  | <b>.40</b> | <b>.29</b>  | <b>.29</b>  | <b>.34</b>  | <b>.40</b>  | <b>.31</b>  | <b>.26</b>  | <b>.23</b>  |

**Table S8.** Correlation coefficients between morning NO<sub>2</sub> × Rate (row) and afternoon O<sub>3</sub> (column) for non-smoke days with ozone exceedances for all site combinations with the peak hour listed to site abbreviation. Significant correlation coefficients are in bold and insignificant in italics (n= 12).

| O <sub>3</sub> w/o smoke    | CP O <sub>3</sub> 14 | WP 14       | SP 15       | NP 14       | B 13        | BP 15       | WC 16       | SS 16       | PP 17       | CC 16       | D 14        | M 15        | JLG 14      |
|-----------------------------|----------------------|-------------|-------------|-------------|-------------|-------------|-------------|-------------|-------------|-------------|-------------|-------------|-------------|
| CP NO <sub>2</sub> × Rate 8 | <b>.51</b>           | <b>.66</b>  | <b>.65</b>  | <b>.85</b>  | <b>.56</b>  | <b>.16</b>  | <b>.38</b>  | <b>.64</b>  | <b>.79</b>  | <b>.86</b>  | <b>.71</b>  | <b>.08</b>  | <b>.69</b>  |
| WP 9                        | <b>.15</b>           | <b>.48</b>  | <b>.42</b>  | <b>.49</b>  | <b>.33</b>  | <b>.40</b>  | <b>.42</b>  | <b>.43</b>  | <b>.54</b>  | <b>.56</b>  | <b>.58</b>  | <b>.37</b>  | <b>.45</b>  |
| SP 8                        | <b>.09</b>           | <b>.24</b>  | <b>.25</b>  | <b>.16</b>  | <b>.36</b>  | <b>.15</b>  | <b>.26</b>  | <b>-.10</b> | <b>.19</b>  | <b>.26</b>  | <b>.27</b>  | <b>.26</b>  | <b>.33</b>  |
| NP 7                        | <b>.41</b>           | <b>.34</b>  | <b>.29</b>  | <b>.36</b>  | <b>.22</b>  | <b>.18</b>  | <b>.03</b>  | <b>.07</b>  | <b>.56</b>  | <b>.56</b>  | <b>.12</b>  | <b>.16</b>  | <b>.55</b>  |
| B 9                         | <b>.20</b>           | <b>.19</b>  | <b>.17</b>  | <b>.02</b>  | <b>.27</b>  | <b>.19</b>  | <b>.37</b>  | <b>.00</b>  | <b>.12</b>  | <b>.07</b>  | <b>.31</b>  | <b>.49</b>  | <b>.20</b>  |
| BP 9                        | <b>-.14</b>          | <b>-.42</b> | <b>-.46</b> | <b>-.25</b> | <b>-.37</b> | <b>-.84</b> | <b>-.50</b> | <b>-.16</b> | <b>-.35</b> | <b>-.45</b> | <b>-.41</b> | <b>-.66</b> | <b>-.48</b> |
| WC 7                        | <b>.10</b>           | <b>.27</b>  | <b>.03</b>  | <b>.18</b>  | <b>.08</b>  | <b>-.20</b> | <b>.05</b>  | <b>-.24</b> | <b>.18</b>  | <b>.12</b>  | <b>.07</b>  | <b>.08</b>  | <b>.34</b>  |
| SS 8                        | <b>.39</b>           | <b>.23</b>  | <b>.23</b>  | <b>.31</b>  | <b>.08</b>  | <b>.28</b>  | <b>.04</b>  | <b>.12</b>  | <b>.46</b>  | <b>.58</b>  | <b>.33</b>  | <b>.30</b>  | <b>.41</b>  |
| PP 9                        | <b>-.64</b>          | <b>-.56</b> | <b>-.43</b> | <b>-.53</b> | <b>-.36</b> | <b>.15</b>  | <b>-.27</b> | <b>-.24</b> | <b>-.43</b> | <b>-.42</b> | <b>-.36</b> | <b>-.13</b> | <b>-.58</b> |
| CC 9                        | <b>-.12</b>          | <b>-.38</b> | <b>-.30</b> | <b>-.34</b> | <b>-.43</b> | <b>-.30</b> | <b>-.31</b> | <b>-.15</b> | <b>-.24</b> | <b>-.11</b> | <b>-.14</b> | <b>-.27</b> | <b>-.41</b> |
| D 9                         | <b>-.42</b>          | <b>-.05</b> | <b>.04</b>  | <b>-.05</b> | <b>.00</b>  | <b>.41</b>  | <b>.13</b>  | <b>.03</b>  | <b>.03</b>  | <b>.13</b>  | <b>.15</b>  | <b>.12</b>  | <b>-.07</b> |
| M 8                         | <b>.04</b>           | <b>.00</b>  | <b>-.03</b> | <b>.11</b>  | <b>-.04</b> | <b>-.13</b> | <b>-.31</b> | <b>-.20</b> | <b>.20</b>  | <b>.25</b>  | <b>-.22</b> | <b>-.34</b> | <b>.18</b>  |
| JLG 9                       | <b>.00</b>           | <b>.25</b>  | <b>.27</b>  | <b>.43</b>  | <b>.16</b>  | <b>.26</b>  | <b>.22</b>  | <b>.40</b>  | <b>.20</b>  | <b>.28</b>  | <b>.37</b>  | <b>.28</b>  | <b>.24</b>  |

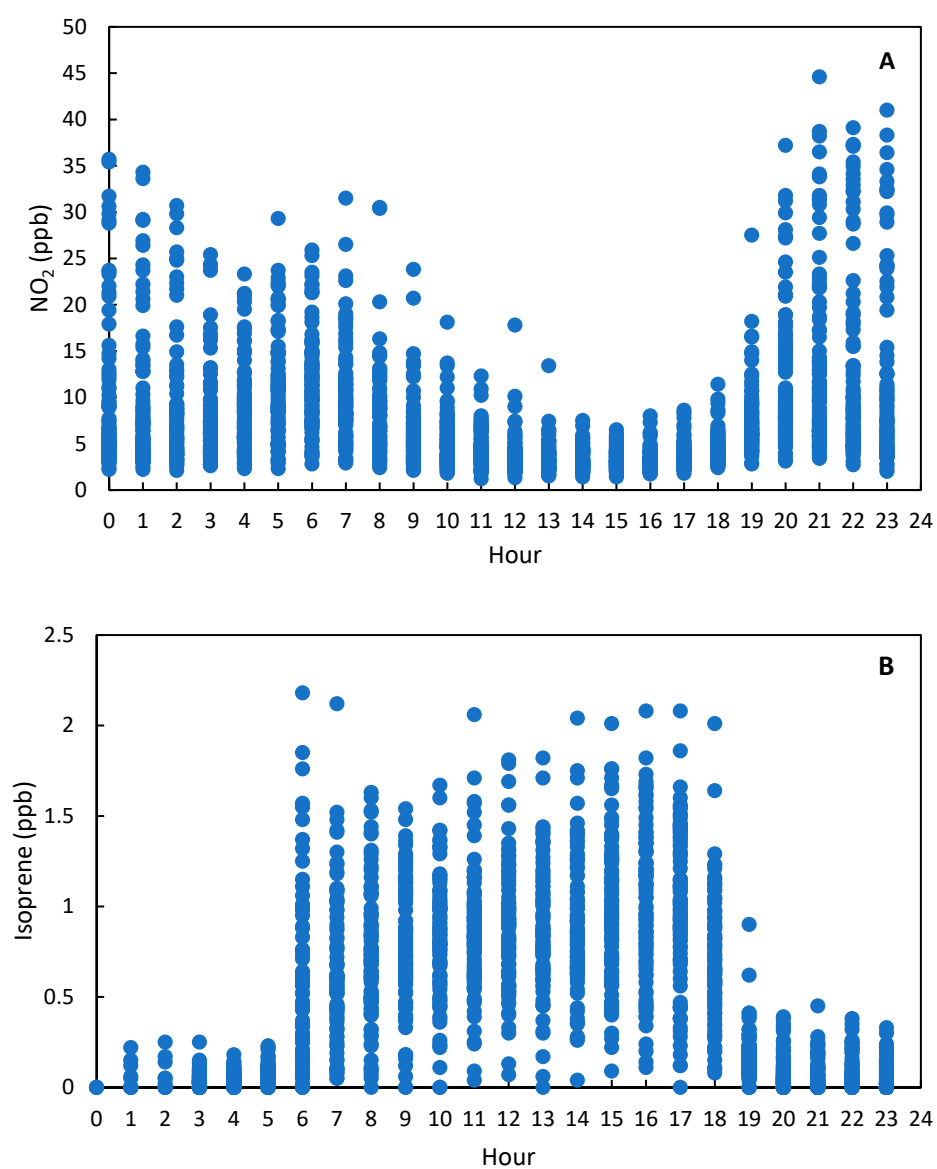

**Figure S19.** NO<sub>2</sub> (A) and isoprene (B) concentrations by hour at Phoenix JLG.

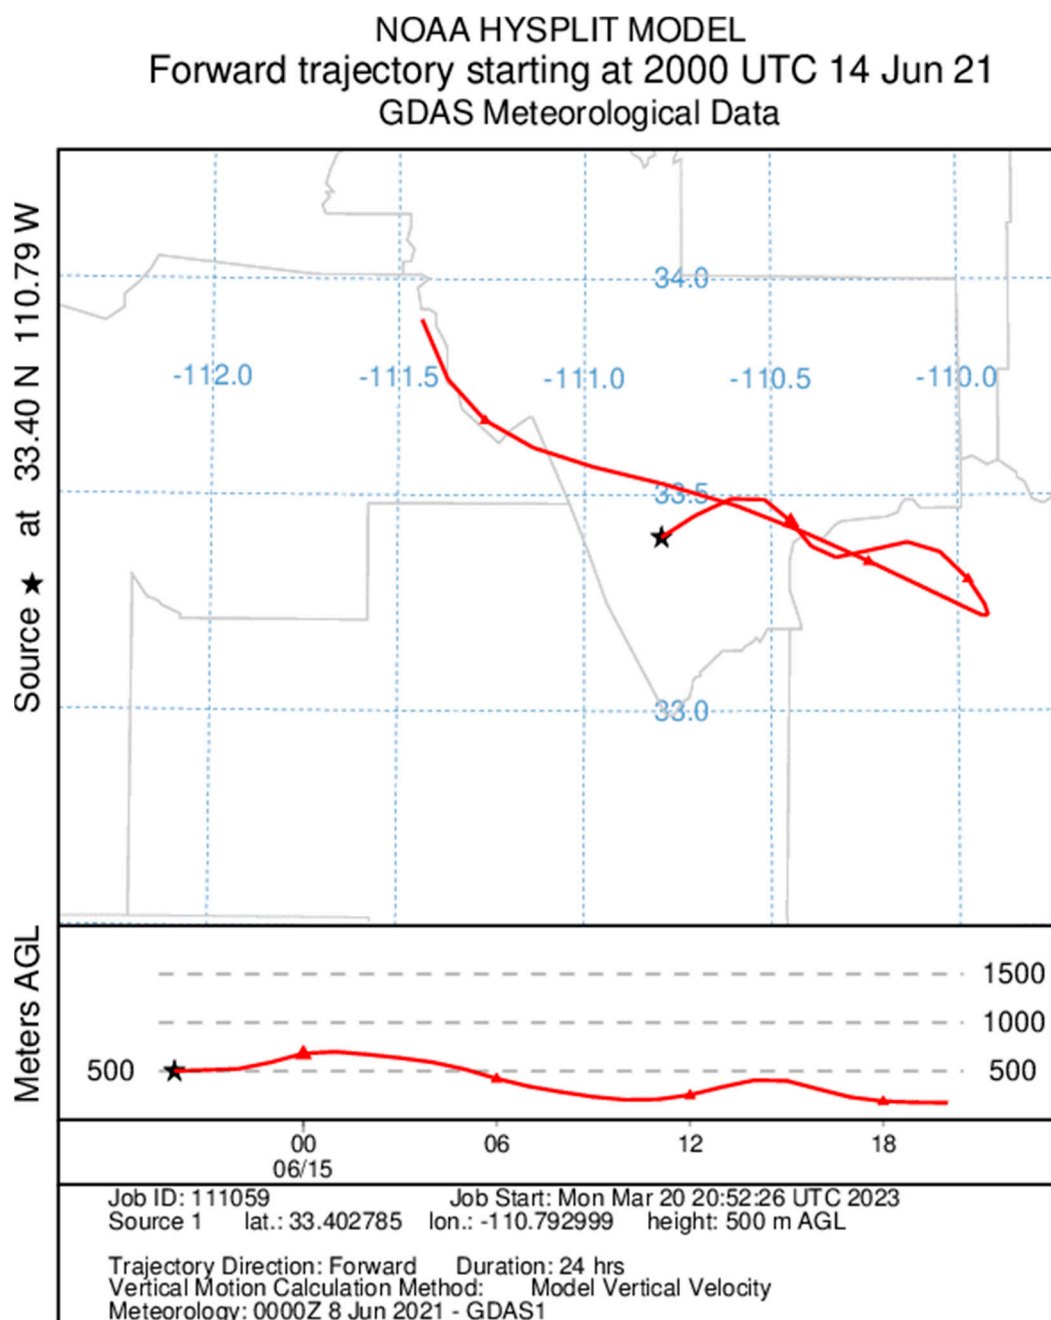

**Figure S20.** HYSPLIT air mass trajectory model from June 15<sup>th</sup>, 2021.



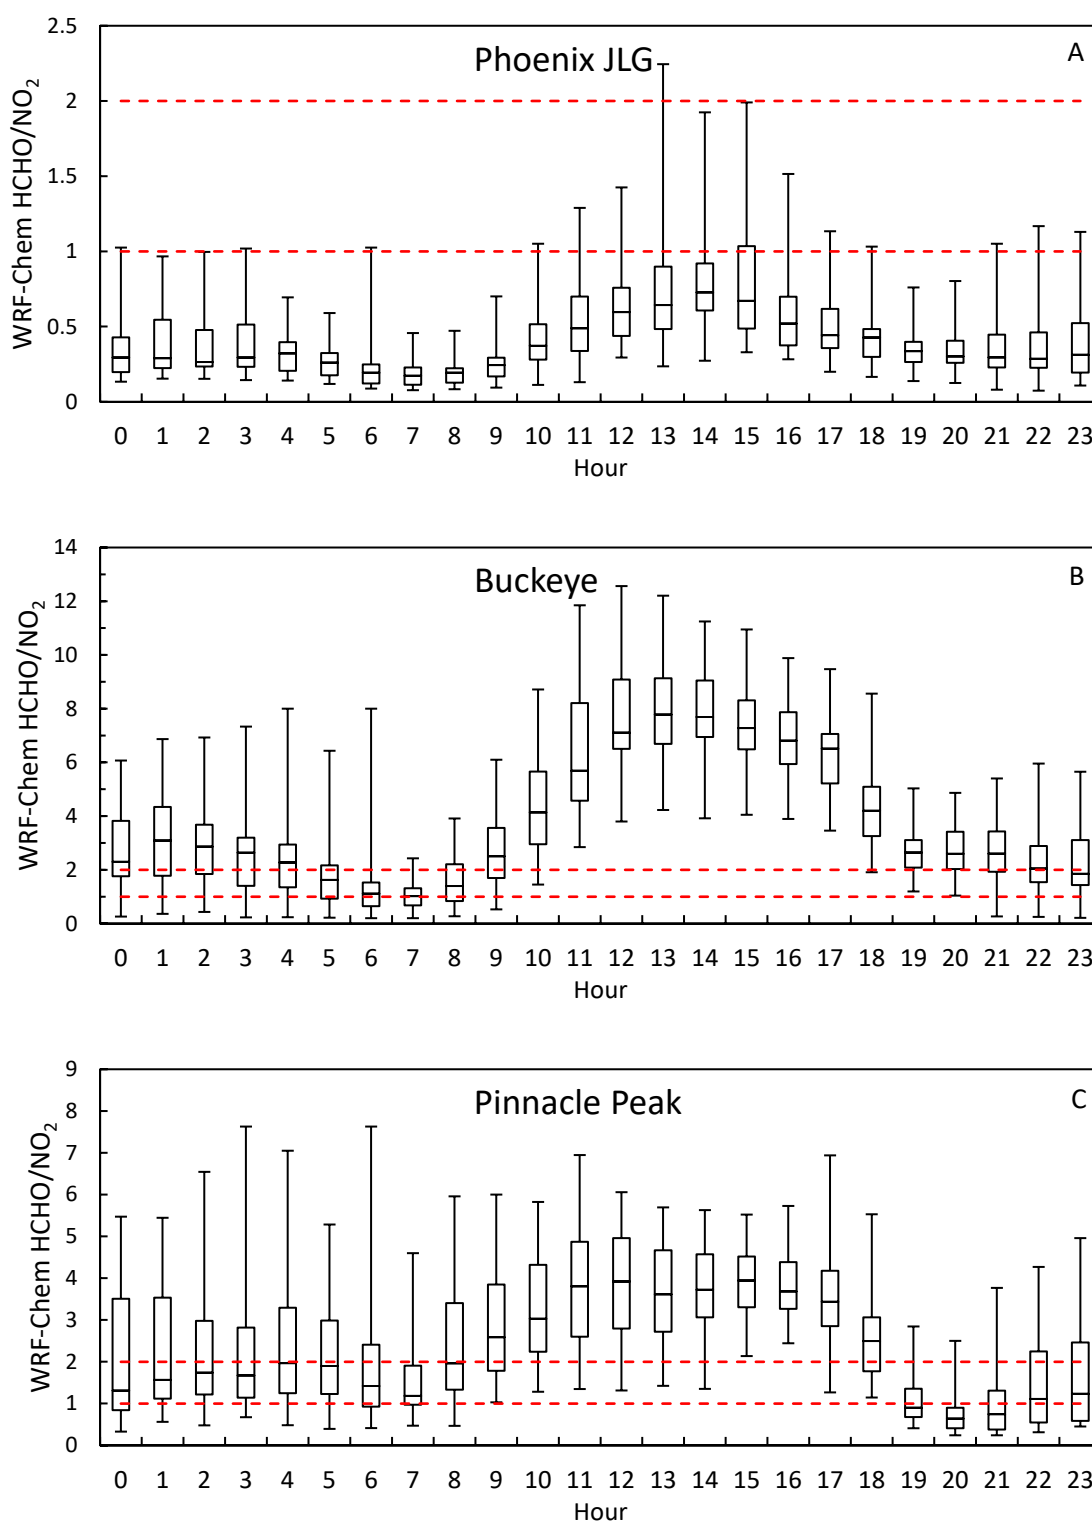

**Figure S21.** Box and whisker plots for WRF-Chem HCHO/NO<sub>2</sub> diurnal cycles for the Phoenix JLG (A), Buckeye (B), and Pinnacle Peak (C) sites. The lines within the boxes represent the medians, the interquartile range is the range of the boxes with the top representing the 75<sup>th</sup> and the bottom the 25<sup>th</sup> percentile. The whiskers represent the maximum and minimum values in the data. The horizontal dashed lines represent the regime transitions.

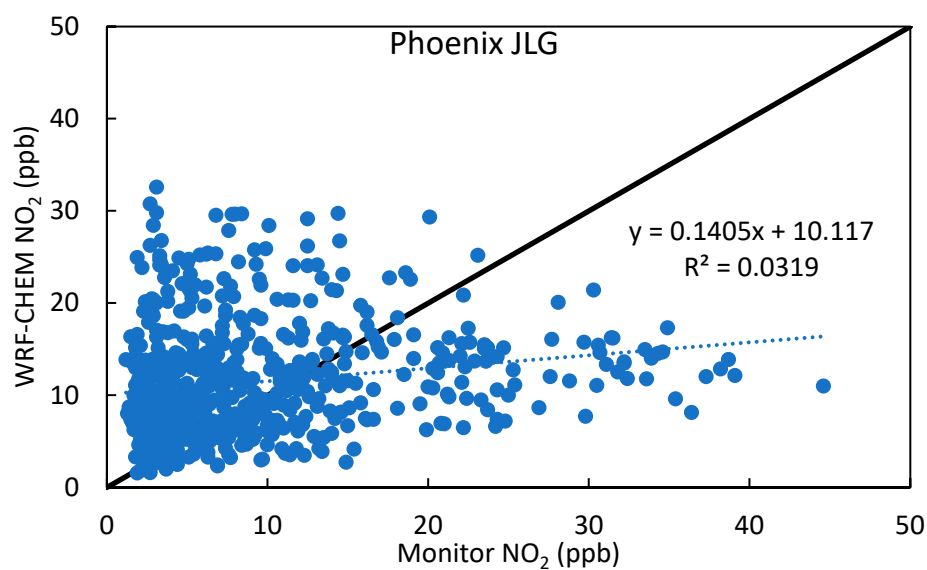

**Figure S22.** Sampled NO<sub>2</sub> from the Phoenix JLG site versus WRF-CHEM modeled NO<sub>2</sub> averaged to match the samples' time periods. Black line represents a 1:1 relationship.

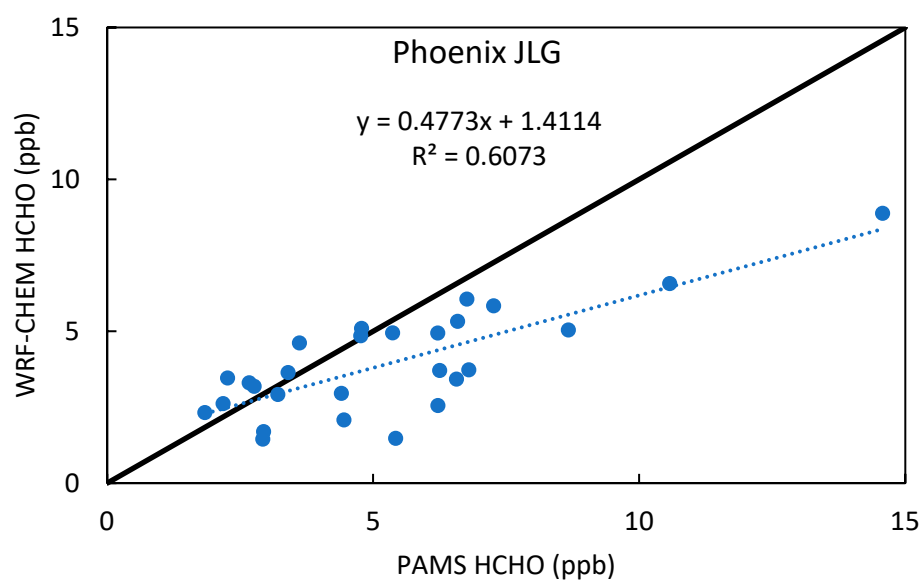

**Figure S23.** Sampled HCHO from the Phoenix JLG site versus WRF-CHEM modeled HCHO averaged to match the samples' time periods. Black line represents a 1:1 relationship.
